# Supplementary material for: Influence of Spatial Heterogeneity of Runoff Generation on the Distributed Unit Hydrograph for Flood Prediction
Source: Copernicus journal article supplement (doi:10.5194/hess-2024-274), 2024-09-23
Supplement: Supplementary file [file hess-2024-274-RC2-supplement.pdf]

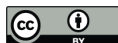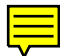

# 1 **Influence of Spatial Heterogeneity of Runoff Generation on the Distributed Unit** 2 **Hydrograph for Flood Prediction**

3 Bin Yi<sup>1,2</sup>, Lu Chen<sup>1,2,3\*</sup>, Binlin Yang<sup>1,2</sup>, Zhiyuan Leng<sup>1,2</sup>, Siming Li<sup>1,2</sup>, Tao Xie<sup>1,2</sup>

4 1. *School of Civil and Hydraulic Engineering, Huazhong University of Science and Technology, Wuhan, 430074, China*

5 2. *Hubei Key Laboratory of Digital Valley Science and Technology, Wuhan 430074, China*

6 3. *School of Water Resources and Civil Engineering, Tibet Agricultural & Animal Husbandry University, Linzhi 860000,*  
7 *China*

8 Correspondence: Lu Chen (chen\_lu@hust.edu.cn)

9 **Abstract:** The spatial scale mismatch between runoff generation and runoff routing is an acceptable  
10 compromise but a common issue in hydrological modeling. Moreover, there is hardly any report  
11 available on whether a unit hydrograph (UH) that is consistent with the spatial scale of runoff  
12 generation can be computed. The objective of this study was to explore the influence of spatial  
13 heterogeneity of runoff generation on the UH for flood prediction. To this end, a novel GIS-based  
14 dynamic time-varying unit hydrograph (DTDUH) was proposed based on the time-varying unit  
15 hydrograph (TDUH). The DTDUH can be defined as a typical hydrograph of direct runoff which gets  
16 generated from one centimeter of effective rainfall falling at a uniform rate over the saturated drainage  
17 basin uniformly during a specific duration. The DTDUH was computed based on the saturated areas  
18 of the watershed instead of the global watershed. The saturated areas were extracted based on the **TWI**.  
19 Finally, the Longhu River basin and Dongshi River basin were selected as two case studies. Results  
20 showed that the proposed method exhibited consistent or better performance compared with that of the  
21 linear reservoir routing method, and performed better than the TDUH method. The proposed method  
22 can be used for watersheds with sparse gauging stations and limited observed rainfall and runoff data,  
23 as for the TDUH method. Simultaneously, it is well applicable to humid or mountain watershed where



24 saturation-excess rainfall is dominant.

25 **Keywords:** Hydrological modeling; Distributed unit hydrograph; Runoff routing; Runoff generation;

26 XAJ model

## 27 **1. Introduction**

28 The assumption that basins behave as linear systems (i.e., there is proportionality and additivity  
29 between excess rainfall and total storm response) has been the core of hydrology over the past century  
30 (Goodrich et al., 1997; Bunster et al., 2019). On such conditions, a single response function named the  
31 UH has been widely applied to acquire the stormflow at the basin outlet (Czyzyk et al., 2020). The UH  
32 can be developed for both gauged and ungauged watersheds (Monajemi et al., 2021). For gauged basins,  
33 unit hydrographs are derived from observed data by measuring rainfall and runoff data. For ungauged  
34 basins, some synthetic methods, such as Snyder's method (Snyder, 1938) and Gray's method (Gray,  
35 1961), are used to determine the unit hydrographs from spatially averaged basin characteristics. One  
36 variation is the synthetic UH method proposed by Clark (1945), in which the UH was derived by  
37 integrating two basic features of a watershed rainfall-runoff process. Specifically, translation through  
38 water movement was characterized by the time-area method, and linear reservoir routing was used to  
39 represent attenuation through storage (Cho et al., 2018; Bunster et al., 2019). This history of  
40 development was synthesized in the works of Rodríguez-Iturbe and Valdés (1979) and Gupta et al.  
41 (1980), who proposed the geomorphological instantaneous unit hydrograph (GIUH). Subsequently, the  
42 width function-based geomorphological instantaneous unit hydrograph (WFIUH) method has been  
43 formulated with the development of digital elevation models (DEMs) and geographic information  
44 system (GIS) technology (Seo et al., 2016). The WFIUH was derived by combining the flow paths to

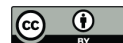

45 the outlet given by the width function with the flow celerity along the flow paths (Kirkby, 1976).

46 The UH method assumes the watershed response to efficient rainfall to be linear and time-  
47 invariant, and rainfall to be spatially homogeneous. In contrast to the linearity assumption, basins have  
48 been shown to exhibit nonlinearity in the transformation of excess rainfall to stormflow (Bunster et al.,  
49 2019). For a small watershed, Minshall (1960) showed that significantly different UHs were produced  
50 by different rainfall intensities. To cope with this nonlinearity, Rodríguez-Iturbe et al. (1982) extended  
51 the GIUH to the geomorphoclimatic IUH (GcIUH) by incorporating excess rainfall intensity. Lee et al.  
52 (2008) proposed a variable kinematic wave GIUH accounting for time-varying rainfall intensity, which  
53 may be applicable to ungauged catchments that are influenced by the high intensity of rainfall. To this  
54 end, it is necessary to consider the geomorphic characteristics of the watershed and incorporate time-  
55 varying rainfall intensity in the rainfall-runoff modeling processes.

56 Spatially distributed travel time models, also known as Spatially Distributed Unit Hydrograph  
57 models (DUH) (Maidment et al., 1996), are a semi-analytical form of the WFIUH identified by Rigon  
58 et al. (2016) in which spatially distributed flow celerity associated with the watershed characteristics  
59 and temporally varying excess rainfall rates can be considered. In this method, the travel time of each  
60 grid cell can be calculated by dividing the travel distance of a cell to the next cell by the velocity of  
61 flow generated in that cell (Paul et al., 2018). The travel time is then summed along the flow path to  
62 obtain the total travel time from each cell to the outlet. The DUH is thus derived using the distribution  
63 of travel time from all grid cells in a watershed. Several aspects (i.e. Rainfall intensities, upstream  
64 contributions, watershed equilibrium) have attracted much attention to obtain more accurate travel  
65 time distributions. Some DUH methods assumed a time-invariant travel time field and ignored the



66 dependence of travel time on excess rainfall intensity (Melesse and Graham, 2004; Noto and La Loggia,  
67 2007; Gibbs et al., 2010; Grimaldi et al., 2010), while others suggested various UHs corresponding to  
68 different storm events, namely time-varying distributed unit hydrograph (TDUH) (Martinez et al.,  
69 2002; Sarangi et al., 2007; Du et al., 2009). The upstream contributions to the travel time estimation  
70 should also be considered in the time-varying DUH method, which was developed from a static  
71 upstream contribution to a dynamic contribution. For example, Bunster et al. (2019) developed a  
72 TDUH model that accounts for dynamic upstream contributions and compared its performance against  
73 other TDUH methods, and characterized the temporal behavior of upstream contributions and its  
74 impact on travel times in the basin. However, the methods discussed above assumed that equilibrium  
75 in each individual grid cell or global watershed can be reached before the end of the rainfall excess  
76 pulse. To this end, Yi et al. (2022) proposed a time-varying distributed unit hydrograph method for  
77 runoff routing that accounts for dynamic rainfall intensity and soil moisture content, namely the time-  
78 varying distributed unit hydrograph considering soil moisture content (TDUH-MC). Hydrologists have  
79 made great efforts to address the nonlinear issues of the UHs in the past decades, while these  
80 approximations are still acceptable compromises in challenging hydrology research.

81       Nevertheless, we found that the approximations discussed above neglected the influence of spatial  
82 heterogeneity of runoff generation on the UH. For instance, in a humid watershed, the excess rainfall  
83 can be more inclined to happen in near-channel areas, and sometimes in the arid zones with long storms  
84 durations according to the saturation-excess mechanism (Li and Sivapalan, 2014). In previous studies,  
85 the time-varying rainfall intensities were commonly considered to obtain more accurate travel time  
86 distributions to compute the UH for the whole basin, while the depth of the excess rainfall was also



87 considered to be uniformly distributed throughout the whole watershed (the excess rainfall comes from  
88 local saturated areas). The outflow hydrograph is then calculated by superimposing the response to  
89 each excess rainfall pulse, or equivalently by convoluting the spatially averaged excess rainfall and a  
90 UH obtained from the IUH. This raised the question of whether the unit hydrograph can reflect the  
91 realities of the runoff routing processes of an actual watershed.

92 The problem of spatial scale mismatch between runoff generation and confluence theory is  
93 prevalent in hydrological modeling, and hydrologists almost ignore the forecasting errors associated  
94 with this issue. For example, the Xinanjiang (XAJ) model is a conceptual hydrological model proposed  
95 by Zhao et al. (1980) for flood forecasts in the Xin'an River basin. It has been widely used in humid  
96 and semi-humid watersheds all over the world (Zhao, 1992; Zhou et al., 2019; Huang et al., 2020). In  
97 the model, two parabolic curves are adopted to represent the spatially non-uniform distribution of the  
98 tension water storage and the free water storage. To match the spatial scales of the runoff generation  
99 and the runoff routing, the excess rainfall generated in the saturated areas was assumed to be uniformly  
100 distributed across the whole basin. However, this assumption may result in huge errors, and there is  
101 hardly any report available on whether UH that is consistent with the spatial scale of runoff generation  
102 can be computed (Andrieu et al., 2021).

103 The objective of this study was therefore to explore the influence of spatial heterogeneity of runoff  
104 generation on the UH for flood prediction. The main contributions of the present study are given as  
105 follows. 1) The DUH method was used as the basic tool to compute the DTDUH corresponding to  
106 various saturated states of the watershed. 2) The definition of the DTDUH was different from the  
107 traditional TDUH as it represented the characteristics of the runoff-generating areas instead of the



108 whole basin. 3) The XAJ model was used as the hydrological modeling framework to compare the  
109 performances of TDUH and DTDUH based on flood events. The Longhu River basin and the Dongshi  
110 River basin in the Guangdong Province, China, were selected as two case studies. The influence of  
111 spatial heterogeneity of runoff generation on the UH for flood prediction was investigated.

112 The remaining chapters of this paper are arranged as follows: In Hydrological models, the  
113 processes of DTDUH considering the spatial heterogeneity of runoff generation are introduced, and  
114 the parameter calibration method, evaluation criteria as well as the hydrologic model are demonstrated.  
115 In section **study area and data**, the rainfall and runoff data and the study areas are described. In section  
116 **results**, the performances and results of the TDUH and DTUHD are compared. In section **discussion**,  
117 the results and methods were discussed and in section **conclusions**, relevant conclusions were drawn.

## 118 **2. Hydrological models**

### 119 *2.1 Runoff generation based on the saturation-excess mechanism*

120 Mostly, saturation-excess runoff is the major runoff mechanism in humid areas (Tromp-Van  
121 Meerveld and McDonnell, 2006; Hoang et al., 2017). Many hydrological models, such as the  
122 TOPMODEL (Beven and Kirkby, 1979), the Variable Infiltration Capacity (VIC) model (Liang et al.,  
123 1994), the Probability Distributed Model (PDM) (Moore, 2007), the XAJ model (Zhao, 1992), and the  
124 Australian Water Balance Model (Boughton, 2004), simulate saturation-excess runoff by introducing  
125 a statistical distribution of tension water storage capacity using different methods. Simultaneously, a  
126 free water capacity distribution curve is usually used to divide the total runoff into the surface runoff,  
127 interflow, and groundwater. In the XAJ model, two parabolic curves are adopted to represent the  
128 spatially non-uniform distribution of the tension water storage and free water storage (Fig. 1).

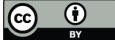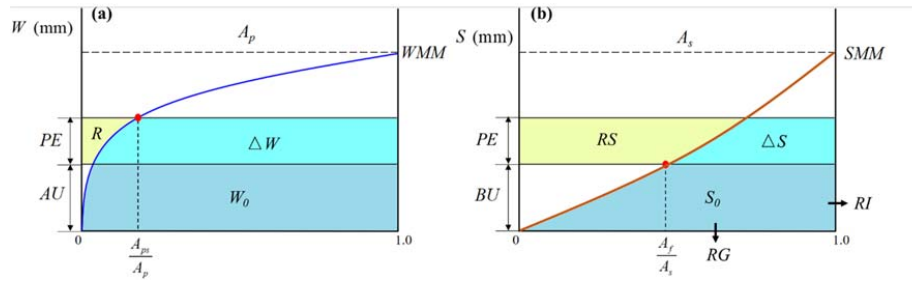

129

130 **Figure 1.** (a) Tension water storage capacity curve, and (b) Free water storage capacity curve

131 The difference between field capacity and total soil water content is defined as tension water  
 132 storage capacity, the maximum amount of water available in an unsaturated zone. In the XAJ model,  
 133 a tension water capacity curve is introduced (Fig. 1(a)) to describe the non-uniform distribution of  
 134 tension water capacity throughout the basin or sub-basin. In Fig. 1(a),  $A_{ps}$  is the partial pervious area  
 135 where the tension water storage capacity is less than or equal to the value  $W$ , which is the tension water  
 136 capacity at a point, varying from 0 to a maximum  $WMM$ ;  $A_p$  is the pervious area;  $W_0$  is the initial areal  
 137 mean tension water storage (mm); and  $AU$  is the vertical coordinate corresponding to  $W_0$ . The  
 138 functional relationship of the tension water storage capacity curve is expressed as:

139 
$$\frac{A_{ps}}{A_p} = 1 - \left(1 - \frac{W}{WMM}\right)^B \quad (1)$$

140 Based on Eq. (1), when rainfall exceeds evaporation, the runoff generated in the saturated areas  
 141 can be calculated as:

142 
$$R = \begin{cases} \int_{AU}^{AU+PE} \frac{A_{ps}}{A_p} dW & PE + AU < WMM \\ PE - WM + W_0 & PE + AU \geq WMM \end{cases} \quad (2)$$

143 The total runoff  $R$  ( $R=RS+RI+RG$ ), generated in a wet period in accordance with Eq. (2), must be  
 144 separated into three components, including the surface runoff, the subsurface stormflow, and the



145 surface runoff. Thus, the concept of free water storage capacity was used, and it was assumed to be  
 146 distributed between zero and a point maximum  $SMM$  in a parabolic manner, as shown in Fig. 1(b). In  
 147 Fig. 1(b),  $A_p$  is the pervious area of the catchment;  $A_f$  is the area where the free water storage capacity  
 148 is less than or equal to the value  $S$ , varying from 0 to  $SMM$ ;  $A_s$  is the runoff generation area;  $S_0$  is the  
 149 initial areal mean free water storage (mm);  $BU$  is the vertical coordinate corresponding to  $S_0$ ; and  $RI$ ,  
 150  $RG$  represent the depth of the interflow and subsurface flow. The functional relationship of the free  
 151 water storage capacity curve is expressed as:

$$152 \quad \frac{A_f}{A_s} = 1 - \left(1 - \frac{S}{SMM}\right)^{EX} \quad (3)$$

153 The total runoff  $R$ , generated in a wet period in accordance with Eq. (3), can be subsequently  
 154 separated into three components, including the surface runoff, interflow, and groundwater, which can  
 155 be expressed by

$$156 \quad RS = \begin{cases} FR \int_{BU}^{BU+PE} \frac{A_f}{A_s} dS & PE + BU < SMM \\ FR(PE + S_0 - SM) & PE + BU \geq SMM \end{cases} \quad (4)$$

$$157 \quad RI = KI \cdot FR \cdot \int_0^{BU} \frac{A_f}{A_s} dS \quad (5)$$

$$158 \quad RG = KG \cdot FR \cdot \int_0^{BU} \frac{A_f}{A_s} dS \quad (6)$$

159 where  $RS$ ,  $RI$ , and  $RG$  represent the depth of the surface runoff, interflow, and groundwater  
 160 respectively (mm);  $FR$ , equaling to  $R/PE$ , is the proportion of the runoff-producing area over the whole  
 161 basin;  $SM$  is the areal mean free water capacity (mm); and  $KI$  and  $KG$  are outflow coefficients of the  
 162 free water storage to interflow and groundwater, respectively.





163 *2.2 Definition, conceptual and derivation of the DTDUH*

164 The GIS-derived DUH method was employed for the surface runoff routing calculations, which  
 165 allowed the velocity to be calculated on a grid cell basis over the watershed. To remove the linearity  
 166 assumption, fully distributed models use routing methods which are usually computationally intensive  
 167 because they solve the St. Venant equations (Bunster et al., 2019), so they are usually limited to small  
 168 basins. Therefore, the DUH method is an alternative method that allows the use of distributed  
 169 information in a much more efficient manner. The TDUH method was used for the computation of the  
 170 UH, which considered both the time-varying rainfall intensities and the soil moisture. More details can  
 171 be found in Yi et al. (2022). The DTDUH proposed in this study is computed based on the TDUH, and  
 172 the proposed DTDUH was computed based on the runoff generation areas instead of the whole basin.  
 173 This realization was significantly different from the current understanding (Gibbs et al., 2010; Goñi et  
 174 al., 2019; Andrieu et al., 2021). The differences in the definition and assumptions between the current  
 175 theory and the DTDUH have been concluded in Table 1, and the schematic diagram of the DTDUH  
 176 method is shown in Fig. 2.

177 **Table 1.** The differences in the definition and assumptions between the current theory and the DTDUH.

| Differences | Current theory                                                                                                                                                                                      | DTDUH                                                                                                                                                                                                  |
|-------------|-----------------------------------------------------------------------------------------------------------------------------------------------------------------------------------------------------|--------------------------------------------------------------------------------------------------------------------------------------------------------------------------------------------------------|
| Definition  | A typical hydrograph of direct runoff which gets generated from one centimeter of effective rainfall falling at a uniform rate over the entire drainage basin uniformly during a specific duration. | A typical hydrograph of direct runoff which gets generated from one centimeter of effective rainfall falling at a uniform rate over the saturated drainage basin uniformly during a specific duration. |
| Assumption  | i) The effective rainfall is uniformly distributed over the entire drainage basin.<br>ii) The effective rainfall occurs uniformly within its specifier duration.                                    | i) The effective rainfall is uniformly distributed over the saturated drainage areas.<br>ii) The effective rainfall occurs uniformly within its specifier duration.                                    |

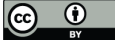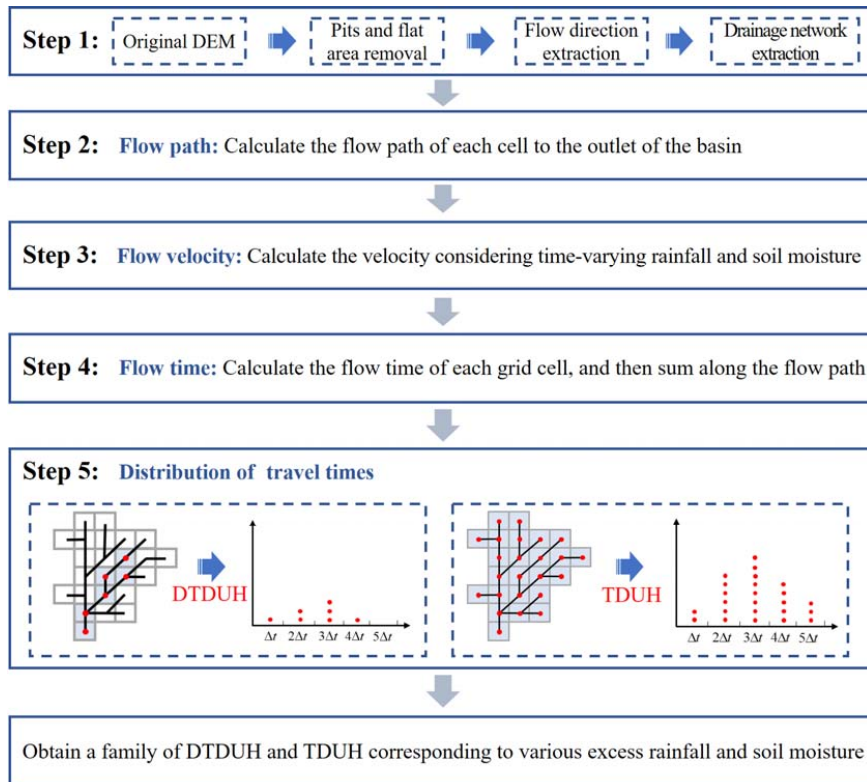

178

179 **Figure 2.** Schematic diagram of the DTDUH method. The main differences between the DTDUH and  
 180 TDUH lie in that the DTDUH is computed based on local areas while the TDUH is for the global  
 181 watershed.

182 1) The drainage network can be identified based on the advanced DEM preprocessing method  
 183 (Grimaldi et al., 2012). Then, the flow path collection ( $\mathbf{Road}_{A_j}$ ) of each grid cell  $A_j$  along the flow  
 184 directions to the basin outlet can be created. For the whole basin, the flow path collection of all the  
 185 grid cells ( $\mathbf{Road}$ ) is expressed by

$$186 \quad \mathbf{Road} = \left\{ \mathbf{Road}_{A_j} \mid A_j \in \mathbf{A} \right\} \quad (7)$$

187 where  $A_j$  ( $j = 1, 2, \dots, N$ ) is the total number of grid cells,  $N$  is the total grid cells of the basin; and  $\mathbf{A}$  is  
 188 the collection of all the grid cells.

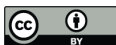

189 The XAJ model adopted the saturation excess runoff generation mechanism, that is, there is no  
190 runoff generated until the tension water capacity is satisfied. However, current methods compute the  
191 DUH corresponding to the whole basin. To this end, we proposed to create a collection of flow paths  
192 for the saturated areas, and the specific formula is given by

$$193 \quad \mathbf{Road}_\alpha = \left\{ \mathbf{Road}_{A_j} \mid A_j \in \mathbf{A}_\alpha \right\} \quad (8)$$

194 where  $\mathbf{Road}_\alpha$  ( $\mathbf{Road}_\alpha \subseteq \mathbf{Road}$ ) is the flow path collection of the saturated grid cells when the soil  
195 moisture proportion is  $\alpha$ ; and  $\mathbf{A}_\alpha$  is the collection of the saturated grid cells when the soil moisture  
196 proportion is  $\alpha$ .

197 2) The flow velocity of each grid cell corresponding to the collection  $\mathbf{Road}_\alpha$  is computed based  
198 on the watershed characteristics and the spatial-temporal distribution characteristics of rainfall and soil  
199 moisture, and the specific formula is given as Eq. (9) (Yi et al., 2022).

$$200 \quad V = k \cdot S^{\frac{1}{2}} \cdot \left( \frac{I_t}{I_c} \right)^{\frac{2}{5}} \cdot (\theta_t)^\gamma \quad (9)$$

201 where  $V$  ( $\text{m s}^{-1}$ ) is the flow velocity;  $k$  ( $\text{m s}^{-1}$ ) is the land use or flow type coefficient,  $S$  ( $\text{m m}^{-1}$ ) is the  
202 slope of the grid cell;  $I_t$  ( $\text{mm h}^{-1}$ ) is the excess rainfall intensity at time  $t$ ;  $I_c$  is the reference excess  
203 rainfall intensity of the basin;  $\gamma$  (unitless) is an exponent smaller than unity, which represents the  
204 nonlinear relationship between soil moisture content and flow velocity; and  $\theta_t$  (unitless) represents the  
205 soil moisture content of the unsaturated areas at time  $t$ , which can be calculated based on Eq. (10)  
206 referring to Yi et al (2022)

$$207 \quad \theta_t = \frac{(B+1)W_t}{WMM + B \cdot W_t} \quad (10)$$

208 3) The travel time for each grid cell in collection  $\mathbf{Road}_\alpha$  can be calculated by Eq. (11). To

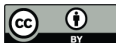

209 compute the total travel time  $\tau_i$  of flow from each cell  $i$  to the outlet, travel times along the  $R_i$  cells  
210 belonging to the flow path that starts at that cell are added based on Eq. (12).

$$211 \quad \Delta\tau_j = \frac{L_j}{V} \quad \text{or} \quad \Delta\tau_j = \frac{\sqrt{2}L_j}{V} \quad (11)$$

$$212 \quad \tau_j = \sum_{A_j \in \mathbf{A}_\alpha} \Delta\tau_j \quad (12)$$

213 where  $\Delta\tau_j$  is the retention time in grid cell  $A_j$ ;  $\tau_j$  is the total travel time along the flow path for grid  
214 cell  $A_j$ ;  $L_j$  is the grid cell size. When the rasterized flow is flowing along the edges of the grid cell,  
215 the travel length is the cell size  $L_j$ , whereas the travel length is  $\sqrt{2}L_j$  when it is flowing diagonally.

216 4) Develop a cumulative travel time map of the saturated areas instead of the whole basin based  
217 on cell-by-cell estimates for hillslope velocities. The cumulative travel time map is further divided into  
218 isochrones, which can be used to generate a time-area curve and the resulting DTDUH corresponding  
219 to the collection  $\mathbf{Road}_\alpha$  instead of  $\mathbf{Road}$ .

220 Specifically, the DTDUH was computed considering the time-varying characteristics of the  
221 saturated areas, and the excess rainfall was redistributed in the saturated areas instead of the whole  
222 basin. The diagram of the DTDUH derivation processes corresponding to various saturated soil  
223 moisture can be shown in Fig. 3. The total travel time from each saturated grid cell to the outlet is  
224 obtained by directly recording each particle's total travel time from the initial location until the particle  
225 leaves the basin. We can obtain the DTDUH when the last particle leaves the basin. There are 24 grid  
226 cells in the basin. For instance, the derivation of the TDUH corresponding to saturated proportions 25%  
227 (6 grid cells) is shown in Fig. 3(a). The DTDUH is not the same as the TDUH until the basin reaches  
228 a global saturation as Fig. 3(d). For instance, when there occurs a stormflow with a depth of 10 mm in  
229 the whole basin and the saturated proportion is 50%, the actual depth of the excess rainfall in the



230 saturated area is 20 mm. In tradition, the flow hydrograph was calculated using the TDUH as Fig. 3(d),  
231 neglecting the issue that excess rainfall particles are only in the saturated areas. This neglect therefore  
232 leads to errors because the unsaturated areas where no excess rainfall is generated contribute to the  
233 confluence. To solve this issue, the flow hydrograph was calculated using the DTDUH as Fig. 3(b) in  
234 this study, and in turn, could improve the forecast performances of the hydrological model.

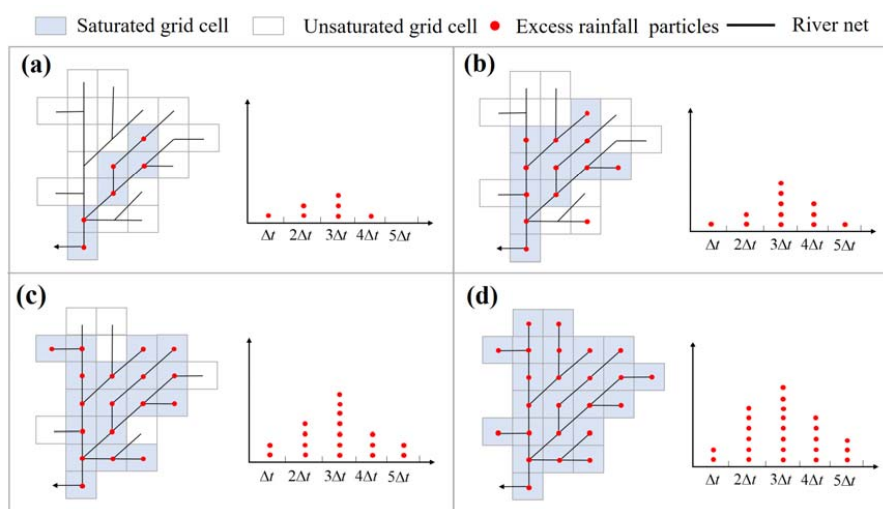

235  
236 **Figure 3.** The diagram of the DTDUH corresponds to various soil moisture. (a)  $\alpha_s = 0.25$ . (b)  
237  $\alpha_s = 0.50$ . (c)  $\alpha_s = 0.75$ . (d)  $\alpha_s = 1.00$ .

### 238 2.3 Hydrological modeling framework

239 The XAJ model proposed by Zhao et al. (1980) was used as the hydrological modeling framework.  
240 It has been widely used in humid and semi-humid watersheds all over the world. There are four  
241 modules in the model including the evapotranspiration module, runoff generation module, runoff  
242 partition module, and runoff routing module. For the evapotranspiration module, the soil profile of  
243 each sub-basin is divided into three layers, the upper, lower, and deeper layers, and only when water

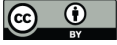

244 in the layer above it has been exhausted does evaporation from the next layer occur. For the runoff  
 245 generation and runoff partition modules in the XAJ model, they have been reviewed in Section 2.1.  
 246 Finally, for the runoff routing module, subsurface stormflow and subsurface runoff were considered  
 247 using a free reservoir. To investigate the influence of spatial heterogeneity of runoff generation on the  
 248 runoff routing, linear reservoir, TDUH, and DTDUH were selected as the surface runoff routing  
 249 methods. When the watershed is divided into multiple sub-basins, the Muskingum method will be used  
 250 to confluence the runoff of each sub-basin to the outlet of the basin. The XAJ modeling framework  
 251 used in this study is given in Fig. 4.

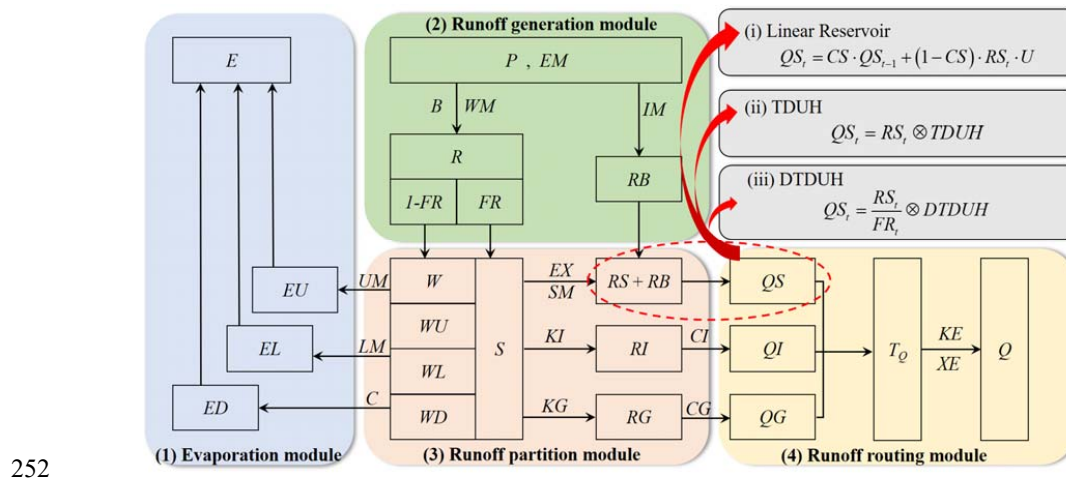

252 **Figure 4.** Schematic diagram of the XAJ model.

253 The depths of the surface runoff calculated by Eq. (4) are obtained after a redistribution to the  
 254 whole basin. As a matter of fact, the depths of the surface runoff should be calculated only over the  
 255 saturated areas when the DTDUH was selected as the surface runoff routing method, which can be  
 256 expressed by

257

$$258 \quad RS'_s = \frac{RS_s}{FR_s} \quad (13)$$



259 where  $RS'_s$  is the depth of the surface runoff corresponding to the saturated areas.

260 When the linear reservoir, TDUH, and DTDUH were used respectively for the surface runoff

261 routing, the flow discharge at the outlet of the watershed can be computed by

$$262 \quad QS_i = CS \cdot QS_{i-1} + (1 - CS) \cdot RS'_i \cdot \frac{F}{3.6\Delta t} \quad (14)$$

$$263 \quad QS_i = RS'_i \otimes TDUH \quad (15)$$

$$264 \quad QS_i = RS'_i \otimes DTDUH \quad (16)$$

265 where  $CS$  is the recession constant of the surface water storage;  $F$  ( $\text{km}^2$ ) is the area of the basin, and

266  $\otimes$  is the symbol of convolution.

267 Simultaneously, the subsurface stormflow ( $RI$ ) and subsurface runoff ( $RG$ ) were considered using

268 a free reservoir, and the proposed routing schemes are applied only to  $RS$ . Their expressions are given

269 by

$$270 \quad QI_i = CI \cdot QI_{i-1} + (1 - CI) \cdot RI_i \cdot U \quad (17)$$

$$271 \quad QG_i = CG \cdot QG_{i-1} + (1 - CG) \cdot RG_i \cdot U \quad (18)$$

272 Subsequently, the total runoff ( $Q_t$ ) at the outlet of the basin can be calculated by

$$273 \quad Q_t = QS_i + QI_i + QG_i \quad (19)$$

#### 274 2.4 Model calibration and evaluation

275 The Shuffled Complex Evolution Algorithm (SCE-UA) technique was developed by the

276 University of Arizona in 1992 for nonlinear, high-dimensional optimization issues (Duan et al., 1992).

277 The technique has been used extensively for calibrating hydrological models (Zhou et al., 2019).

278 Consequently, the SCE-UA method was employed in this study to optimize the parameters of the

279 hydrological model. An aggregated objective function made up of three measures was used for the

280 parameter calibration (Brunner et al., 2021; Yi et al., 2022; Yi et al., 2023). The aggregated objective



281 function and three metrics are expressed by

$$282 \quad E_{NS} = 1 - \frac{\sum_{t=1}^T |Q'_s - Q'_o|}{\sum_{t=1}^T |Q'_o - \bar{Q}_o|} \quad (20)$$

$$283 \quad E_{KG} = 1 - \sqrt{(r-1)^2 + \left(\frac{\sigma_s}{\sigma_o} - 1\right)^2 + \left(\frac{\mu_s}{\mu_o} - 1\right)^2} \quad (21)$$

$$284 \quad R_{SR} = \sqrt{\frac{\sum_{t=1}^T (Q'_o - Q'_s)^2}{\sum_{t=1}^T (Q'_o - \bar{Q}_o)^2}} \quad (22)$$

$$285 \quad M = 0.5 \times (1 - E_{NS}) + 0.25 \times (1 - E_{KG}) + 0.15 \times (1 - \log(E_{NS})) + 0.1 \times R_{SR} \quad (23)$$

286 where  $Q'_o$  is the observed discharge at time  $t$ ;  $Q'_s$  is the simulated discharge at time  $t$ ;  $\bar{Q}_o$  is the  
 287 mean of the observed discharge;  $T$  is the duration of the flood event;  $r$  is the correlation coefficient  
 288 between the observed and simulated flood;  $\sigma_s$  and  $\sigma_o$  are the standard deviation values for the simulated  
 289 and observed responses, respectively; and  $\mu_s$  and  $\mu_o$  are the corresponding mean values.

290 Several criteria were used for the model performance evaluation, consisting of the  $E_{NS}$ , the Root  
 291 Mean Square Error ( $RMSE$ ), the relative flood peak error ( $Q_p$ ), and the flood peak time error ( $T_p$ ),  
 292 which can be expressed by

$$293 \quad RMSE = \sqrt{\frac{1}{T} \sum_{t=1}^T (Q'_s - Q'_o)^2} \quad (24)$$

$$294 \quad Q_p = \frac{Q_p^s - Q_p^o}{Q_p^o} \quad (25)$$

$$295 \quad T_p = T_p^s - T_p^o \quad (26)$$

296 where  $Q_p^s$  is the simulated flood peak discharge;  $Q_p^o$  is the observed flood peak discharge;  $T_p^o$  is the  
 297 observed flood peak time; and  $T_p^s$  is the simulated flood peak time.

298 The parameters of the XAJ model and the DTDUH method were calibrated or evaluated,  
 299 respectively. An explanation of different parameters for evaluation and calibration is summarized in  
 300 Table 1.





301 **Table 1.** Explanation of different parameters for evaluation and calibration.

| Description                                                            | Notation            | Explanation                                                                                                                                                                       |
|------------------------------------------------------------------------|---------------------|-----------------------------------------------------------------------------------------------------------------------------------------------------------------------------------|
| Ratio of potential evapotranspiration to pan evaporation               | $KC$ (unitless)     | 15 parameters of the XAJ model, and these parameters are calibrated based on the SCE-UA method. ( $KE$ and $XE$ are required when a watershed is divided into several sub-basins) |
| Averaged soil moisture storage capacity of the upper layer             | $UM$ (mm)           |                                                                                                                                                                                   |
| Averaged soil moisture storage capacity of the lower layer             | $LM$ (mm)           |                                                                                                                                                                                   |
| Averaged soil moisture storage capacity of the deep layer              | $DM$ (mm)           |                                                                                                                                                                                   |
| Exponential of the distribution to tension water capacity              | $B$ (unitless)      |                                                                                                                                                                                   |
| Percentage of impervious in the watershed                              | $IM$ (unitless)     |                                                                                                                                                                                   |
| Evapotranspiration coefficient of the deeper layer                     | $C$ (unitless)      |                                                                                                                                                                                   |
| Mean free water capacity of the surface soil layer                     | $SM$ (mm)           |                                                                                                                                                                                   |
| Exponent of the distribution to free water capacity                    | $EX$ (unitless)     |                                                                                                                                                                                   |
| Outflow coefficients of the free water storage to subsurface stormflow | $KI$ (unitless)     |                                                                                                                                                                                   |
| Outflow coefficients of the free water storage to subsurface flow      | $KG$ (unitless)     |                                                                                                                                                                                   |
| Recession constants of the subsurface stormflow                        | $CI$ (unitless)     |                                                                                                                                                                                   |
| Recession constants of the surface runoff storage                      | $CG$ (unitless)     |                                                                                                                                                                                   |
| Recession constants of channel network storage                         | $CS$ (unitless)     |                                                                                                                                                                                   |
| Muskingum time constant                                                | $KE$ (h)            |                                                                                                                                                                                   |
| Muskingum weighting factor                                             | $XE$ (unitless)     |                                                                                                                                                                                   |
| Lag in time                                                            | $L$ (h)             |                                                                                                                                                                                   |
| Reference rainfall intensity                                           | $I_c$ (mm/h)        | Evaluated based on the average rainfall intensity                                                                                                                                 |
| Power law related to the influence of soil moisture on flow velocity   | $\gamma$ (unitless) | Evaluated based on the average rainfall intensity (Yi et al., 2022)                                                                                                               |
| Slope of the watershed grid cell                                       | $S$ (m/m)           | Evaluated based on DEM of the watershed                                                                                                                                           |
| Land use or flow type coefficient                                      | $k$ (m/s)           | Evaluated based on different underlying surface types or different flow states (Ajward and Muzik, 2000)                                                                           |

302 **3. Study area and data**

303 The Longhu River basin and the Dongshi River basin were selected as two case study watersheds.



304 The Longhu River and the Dongshi River are located in the humid mountain area, which originates  
305 from the Hanjiang River basin of the Guangdong Province, China. The Longhu River is 17.4 km long,  
306 with a basin area of 102.7 km<sup>2</sup>, and the mean slope of the basin is 2.9 %. The Dongshi River is 23.6 km  
307 long, with a basin area of 152.4 km<sup>2</sup>, and the mean slope of the basin is 3.56 %. The DEM data of the  
308 two basins were collected from Geospatial Data Cloud (<http://www.gscloud.cn/>). The land cover data  
309 can be accessed from Tsinghua University (<http://data.ess.tsinghua.edu.cn/>). The distributions of the  
310 DEM, slope, and land cover for the two basins are shown in Fig. 5.

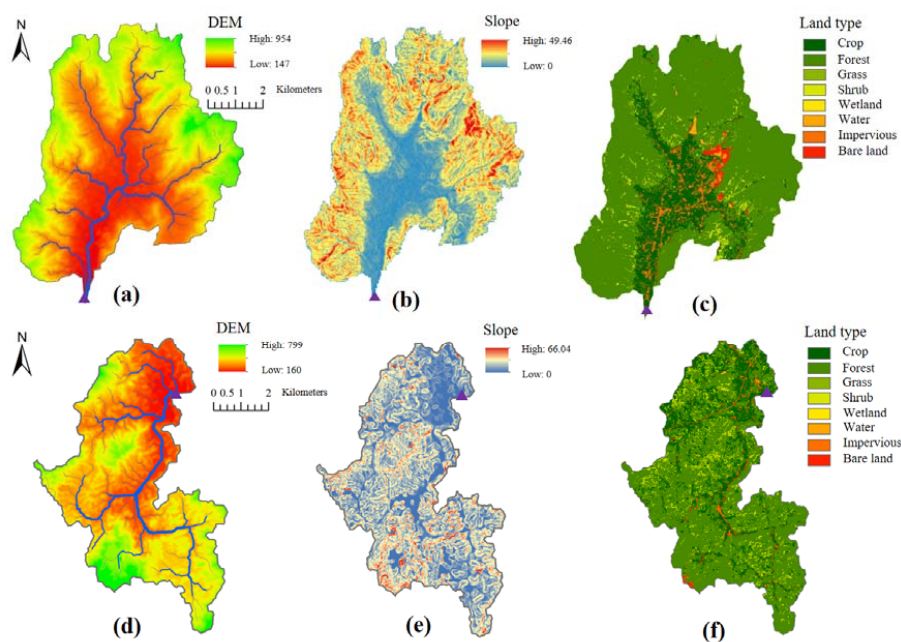

311  
312 **Figure 5.** Distribution of the DEM, slope, and land cover. (a), (b) and (c) are the DEM, slope, and land  
313 cover corresponding to the Dongshi River basin. (d), (e) and (f) are the DEM, slope, and land cover  
314 corresponding to the Longhu River basin.

315 Additionally, the rainfall and evaporation data from meteorological stations for the two basins



316 were collected from 1973 to 2020, and the simultaneous hourly runoff data for the outlet of the  
 317 watersheds were collected as well, and the data were collected from Meizhou Hydrological Bureau. A  
 318 total of 16 isolated storms were identified from the continuous flow process in the Longhu and Dongshi  
 319 River basins, respectively. The Dongshi hydrological station was built in recent years, and the flow  
 320 sequences were therefore short. Specifically, 16 flood events in the Longhu River basin with 1 hour  
 321 interval were collected from 1973 to 2016, and 16 flood events with 1 hour interval were collected  
 322 from the Dongshi River basin from 2015 to 2020. The statistics of these flood events are shown in  
 323 Table 2, where 12 flood events were used to calibrate the model, and 4 flood events were used for  
 324 verification for the two basins. The average flood peaks for the Longhu River basin and the Dongshi  
 325 River basin are  $116.7 \text{ m}^3 \text{ s}^{-1}$  and  $73.0 \text{ m}^3 \text{ s}^{-1}$ , respectively. The average flood durations are about 30 h  
 326 and 33 h, respectively. Moreover, to consider the initial condition, the antecedent precipitation was  
 327 calculated based on the daily recession coefficient of the water storage.

328 **Table 2.** Statistics of the flood events in the Longhu and the Dongshi River basins.

| Watershed | Periods      | Flood events | Rainfall<br>(mm) | Flood peak<br>( $\text{m}^3 \text{ s}^{-1}$ ) | Time duration<br>(h) |
|-----------|--------------|--------------|------------------|-----------------------------------------------|----------------------|
| Longhu    | Calibration  | 19730508     | 80.0             | 94.5                                          | 27                   |
|           |              | 19730720     | 76.7             | 180.0                                         | 17                   |
|           |              | 19750526     | 54.9             | 101.0                                         | 21                   |
|           |              | 19760702     | 73.0             | 137.0                                         | 28                   |
|           |              | 19770526     | 73.8             | 90.4                                          | 18                   |
|           |              | 19771003     | 62.1             | 97.5                                          | 19                   |
|           |              | 19790607     | 100.3            | 93.4                                          | 24                   |
|           |              | 19890502     | 46.5             | 132.0                                         | 29                   |
|           |              | 20030517     | 94.0             | 140.0                                         | 46                   |
|           |              | 20060601     | 56.0             | 96.5                                          | 37                   |
|           |              | 20120527     | 118.8            | 128.0                                         | 27                   |
|           |              | 20130713     | 214.4            | 228.0                                         | 30                   |
|           | Verification | 20150601     | 83.4             | 85.0                                          | 44                   |
|           |              | 20150831     | 102.6            | 83.2                                          | 30                   |



|         |              |          |       |       |    |
|---------|--------------|----------|-------|-------|----|
|         |              | 20160430 | 111.2 | 91.0  | 54 |
|         |              | 20160903 | 85.4  | 89.7  | 26 |
|         |              | 20150509 | 105.2 | 62.9  | 38 |
|         |              | 20150721 | 132.0 | 82.0  | 29 |
|         |              | 20160811 | 90.0  | 51.3  | 48 |
|         |              | 20160819 | 112.5 | 34.9  | 19 |
|         |              | 20161021 | 158.8 | 48.0  | 49 |
|         | Calibration  | 20170501 | 84.5  | 98.3  | 22 |
|         |              | 20170515 | 84.0  | 43.7  | 29 |
|         |              | 20170613 | 139.2 | 37.2  | 31 |
| Dongshi |              | 20170929 | 71.0  | 101.2 | 25 |
|         |              | 20180606 | 61.5  | 34.9  | 32 |
|         |              | 20180702 | 23.5  | 44.3  | 25 |
|         |              | 20190418 | 86.4  | 35.5  | 18 |
|         |              | 20190609 | 107.6 | 272.0 | 27 |
|         | Verification | 20190612 | 74.0  | 100.0 | 66 |
|         |              | 20200522 | 67.5  | 71.0  | 37 |
|         |              | 20200607 | 109.3 | 50.6  | 26 |

## 329 4. Results

### 330 4.1 Calibration of parameters

331 The core of the DUH was the calculation of the grid flow velocity. The parameters that need to  
 332 be determined in Eq. (9) consist of  $k$ ,  $S$ ,  $I_c$ , and  $\gamma$ , in which  $k$  was the velocity coefficient and was  
 333 determined based on different underlying surface types or different flow states (Foda et al., 2017), as  
 334 shown in Fig. 5(c) and Fig. 5(f).  $S$  was the grid cell slope of the study areas, which could be obtained  
 335 from the DEM data of the target basin, as shown in Fig. 5(b) and Fig. 5(e).  $I_c$  was determined using  
 336 the hourly mean rainfall intensity of the target basin, and this parameter was  $10 \text{ mm h}^{-1}$  for the two  
 337 study watersheds. Additionally,  $\gamma$  is a power law related to the influence of soil moisture on flow  
 338 velocity, and the sensitivity analysis for variable gamma has been made in the previous study. The  
 339 results show that the mean flow velocity of the basin was significantly influenced by exponent  $\gamma$ . In  
 340 addition, when the soil moisture content exceeded 0.7, the variation range of mean flow velocity  
 341 decreased sharply, which means that the influence of parameter  $\gamma$  on the flow velocity decreased



342 gradually with the increase of soil moisture content. In theory,  $I_c$  and  $\gamma$  are different from one flood  
343 event to another. However, it is difficult to realize in practical use, and we usually adopted the unit  
344 hydrograph charactering the average physical properties of a watershed. Thus, in practical flood  
345 forecasting, the parameter  $\gamma$  should be a constant once it is determined. This is similar to the influence  
346 of upstream contributions to the flow velocity formula in previous research (Rodríguez-Iturbe et al.,  
347 1992). Therefore, the parameter  $\gamma$  of soil moisture content was determined to be 0.5 to reflect the  
348 influence of soil moisture content on the flow velocity for the two basins (Yi et al., 2022). In addition,  
349 it is noteworthy that the raster size of the two basins was divided into  $30\text{ m} \times 30\text{ m}$ . The rationality of  
350 the TDUH in these two basins had been validated in our previous research (Yi and Chen, 2022; Yi et  
351 al., 2022), and thus was not calibrated in this study.

#### 352 *4.2 Computation of the DTDUH*

353 The TDUH was derived referring to Yi et al. (2022) and the rationality of the TDUH has been  
354 validated. The derivations of the proposed DTDUH were similar to those of the TDUH. The main  
355 difference lay that the DTDUH was derived for a specific saturated area. To obtain the DTDUHs  
356 corresponding to various saturated states of the watershed, the tension water storage in each grid cell  
357 within the basin was considered to be negatively correlated with the Topographic Wetness Index (TWI)  
358 (Shi et al., 2008; Tong et al., 2018; Yuan et al., 2019). We assumed topographic information captures  
359 the runoff generation heterogeneity at the catchment scale, and the TWI was used as an index to  
360 identify rainfall–runoff similarity (Beven and Kirkby, 1979). Areas with similar TWI values are  
361 regarded as possessing equal runoff generation potential. Specifically, the areas with larger TWI values  
362 tend to be saturated first and contribute to saturation excess rainfall; but the areas with lower TWI  
363 values need more water to reach saturation and generate runoff (Gao et al., 2019).



364 Then, the proposed distributed unit hydrographs (DTDUH) are computed based on the saturated  
 365 areas, which can be expressed by TWI. When calculating discharge using the DTDUH, we should  
 366 select various DTDUHs based on the time-varying soil moisture within each time interval.  
 367 Theoretically, the DTDUH is different at each time interval because  $\theta_t$  is ranging from 0 to 1.  
 368 However, practically applying time-varying soil moisture based on DTDUH can be a complex task.  
 369 To improve the effectiveness of the routing method, the soil moisture contents  $\theta_t$  in Eq. (9) were  
 370 discretized to 0.25, 0.5, 0.75, and 1 based on the distributions of the TWI. Then, a simplified DTDUH  
 371 can be obtained in a certain range of soil moisture content. These ranges are presented in Table 3. The  
 372 distribution of the saturated areas corresponding to different soil proportions is shown in Fig. 6.  
 373 Similarly, the ratio of excess rainfall intensity and the reference excess rainfall intensity  $\frac{I_t}{I_c}$  in Eq. (9)  
 374 were discretized to 0.5, 1, 1.5, and 2 to improve the calculation efficiency. More details can be found  
 375 in Yi et al. (2022).

376 **Table 3.** The soil moisture content  $\alpha_t$  of each interval corresponds to the discrete soil moisture  $\theta_s$ .

| Soil moisture $\theta_t$          | $0 \leq \theta_t \leq 0.25$ | $0.25 < \theta_t \leq 0.5$ | $0.5 < \theta_t \leq 0.75$ | $0.75 < \theta_t \leq 1$ |
|-----------------------------------|-----------------------------|----------------------------|----------------------------|--------------------------|
| Discrete soil moisture $\theta_s$ | 0.25                        | 0.5                        | 0.75                       | 1                        |

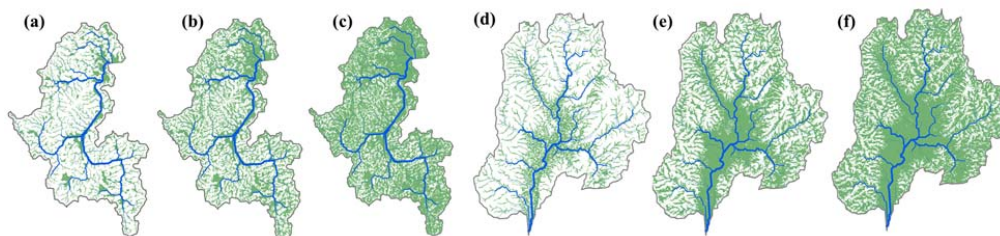

377  
 378 **Figure 6.** Saturated areas correspond to various soil moisture proportions, where the green area  
 379 represents the saturated region and the white area represents the unsaturated region. (a), (b) and (c) are  
 380 the saturated areas corresponding to 0.25, 0.5, and 0.75 soil moisture proportions for the Longhu River



381 basin. (d), (e) and (f) are the saturated areas corresponding to 0.25, 0.5, and 0.75 soil moisture  
382 proportions for the Dongshi River basin.

383 The computed TDUHs and DTDUHs for the Longhu River basin and the Dongshi River basin  
384 are demonstrated in Fig. 7 to Fig. 10. For instance, when the excess rainfall intensities range from 0 to  
385  $5 \text{ mm h}^{-1}$  and the soil moisture contents are between 0 and 0.25, the TDUH used for the surface runoff  
386 routing is corresponding to the red line in Fig. 7(a) for the Longhu River basin. Although the time to  
387 peak and flow peak discharge can be different for various TDUHs, the areas below the curve are the  
388 same as each other. However, the areas below the curve are not necessarily the same for the DTDUH,  
389 as the proposed DTDUH is derived from the saturated areas, as shown in Fig. 8. Only when the  
390 watershed reaches a global saturated state will the DTDUH be the same as the TDUH.

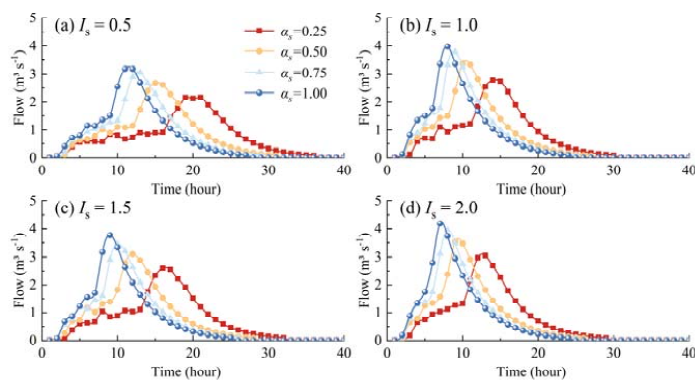

391  
392 **Figure 7.** The TDUHs of the Longhu River basin. (a)  $I_s = 0.5$ . (b)  $I_s = 1.0$ . (c)  $I_s = 1.5$ . (d)  $I_s = 2.0$ .

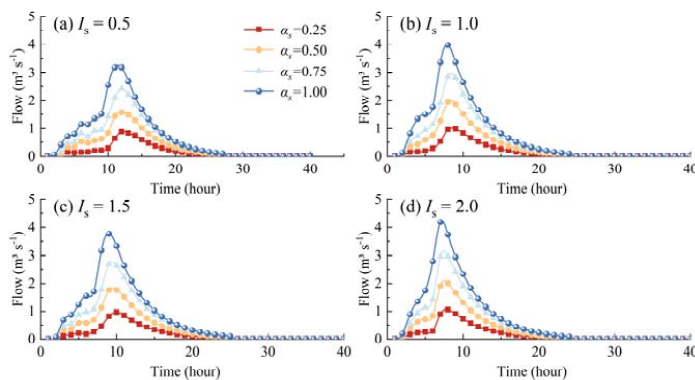

393





394 **Figure 8.** The DTDUHs of the Longhu River basin. (a)  $I_s = 0.5$ . (b)  $I_s = 1.0$ . (c)  $I_s = 1.5$ . (d)  $I_s = 2.0$ .

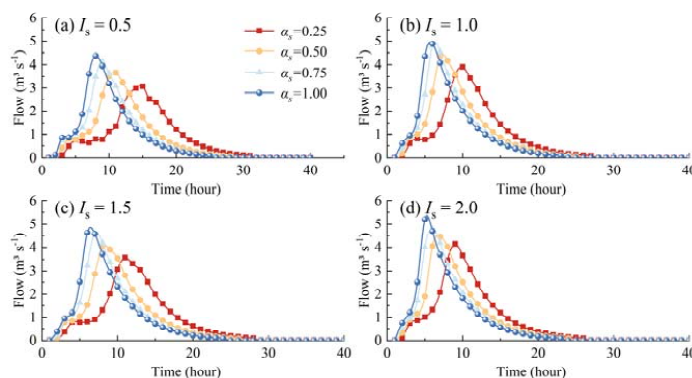

395

396 **Figure 9.** The TDUHs of the Dongshi River basin. (a)  $I_s = 0.5$ . (b)  $I_s = 1.0$ . (c)  $I_s = 1.5$ . (d)  $I_s = 2.0$ .

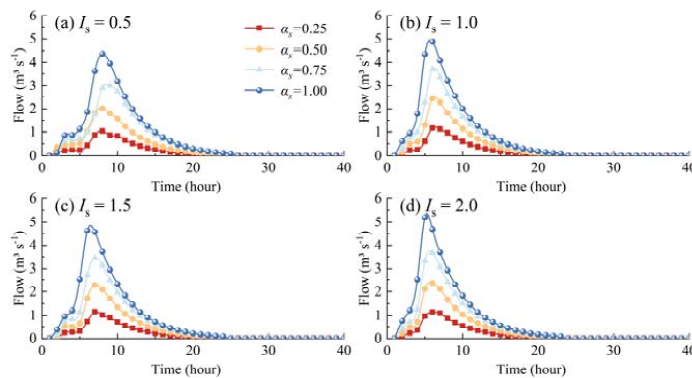

397

398 **Figure 10.** The DTDUHs of the Dongshi River basin. (a)  $I_s = 0.5$ . (b)  $I_s = 1.0$ . (c)  $I_s = 1.5$ . (d)  $I_s =$

399 2.0.

400 It is noteworthy that for the same rainfall intensity, the time to peak of the DTDUHs  
401 corresponding to various soil moisture content is almost consistent with slight variations. For instance,  
402 the time to peak of DTDUHs presented in Figures 8 and 10 do not vary with the saturation level. This  
403 is because we extracted the saturated areas based on the TWI for the DTDUHs, and the derived unit  
404 hydrographs correspond only to the saturated areas. To that end,  $\theta_t$  is almost equal to 1 when deriving  
405 DTDUHs, and, as a result, the time to peak varies not very significantly with the soil moisture.





406 *4.3 Performances of the DTDUH for the Longhu and Dongshi River basins*

407 We calibrated the three models (XAJ+LR, XAJ+TDUH, and XAJ+DTDUH), respectively, to  
 408 compare the fluence of heterogeneity of soil moisture on various runoff routing methods. A total of 16  
 409 isolated storms with observed runoff responses from 1973 to 2016 were selected to explore the  
 410 performances of the TDUH and DTDUH for the Longhu River basin. Table 4 lists the  $E_{NS}$ ,  $RMSE$ ,  
 411 error of flood peak ( $Q_p$ ), and error of time to peak ( $T_p$ ) values for all the models of the Longhu River  
 412 basin, among which No. 20150831, 20160430, 20160903, and 201651021 are validation datasets. To  
 413 demonstrate the model performances of different strategies more visually, Fig. 11 shows line charts of  
 414 the three runoff routing methods for the four indexes in both calibration and validation periods.

415 **Table 4.** Calibrated and Validated results of the Longhu River basin.

| Flood events | $E_{NS}$ |      |       | $RMSE$ (m <sup>3</sup> /s) |       |       | $Q_p$ |       |       | $T_p$ (h) |      |       |
|--------------|----------|------|-------|----------------------------|-------|-------|-------|-------|-------|-----------|------|-------|
|              | LR       | TDUH | DTDUH | LR                         | TDUH  | DTDUH | LR    | TDUH  | DTDUH | LR        | TDUH | DTDUH |
| 19730508     | 0.77     | 0.83 | 0.85  | 13.66                      | 11.67 | 11.11 | -0.28 | -0.22 | -0.21 | 3         | 3    | 3     |
| 19730720     | 0.84     | 0.87 | 0.90  | 22.09                      | 19.85 | 17.69 | -0.22 | -0.05 | -0.05 | 1         | 0    | 0     |
| 19750526     | 0.60     | 0.76 | 0.86  | 17.04                      | 13.24 | 10.13 | -0.36 | -0.27 | 0.18  | 0         | -1   | 0     |
| 19760702     | 0.59     | 0.68 | 0.67  | 21.96                      | 19.45 | 19.73 | -0.53 | -0.39 | -0.39 | 1         | 3    | 3     |
| 19770526     | 0.38     | 0.11 | 0.10  | 21.83                      | 26.09 | 26.28 | -0.30 | -0.19 | -0.19 | 3         | 2    | 2     |
| 19771003     | 0.54     | 0.32 | 0.37  | 19.29                      | 23.47 | 22.60 | -0.28 | -0.20 | -0.19 | 0         | 3    | 2     |
| 19790607     | 0.31     | 0.34 | 0.47  | 23.41                      | 22.91 | 20.39 | -0.28 | -0.25 | -0.25 | 2         | 2    | 2     |
| 19890502     | 0.46     | 0.49 | 0.52  | 28.24                      | 27.65 | 26.80 | -0.64 | -0.66 | -0.50 | -1        | 1    | 0     |
| 20030517     | 0.49     | 0.54 | 0.54  | 31.63                      | 30.30 | 30.07 | -0.35 | -0.32 | -0.32 | 0         | -1   | -1    |
| 20120527     | 0.72     | 0.73 | 0.72  | 21.15                      | 20.69 | 21.03 | -0.25 | 0.03  | 0.03  | -2        | 0    | 0     |
| 20130713     | 0.70     | 0.82 | 0.81  | 37.50                      | 28.74 | 30.22 | -0.33 | -0.30 | -0.32 | 1         | 0    | 0     |
| 20150601     | 0.52     | 0.84 | 0.82  | 19.08                      | 10.94 | 11.70 | 0.50  | 0.15  | 0.25  | 0         | -1   | -1    |
| 20150831     | 0.82     | 0.74 | 0.76  | 11.88                      | 14.12 | 13.58 | -0.21 | -0.02 | 0.00  | -3        | 1    | 1     |
| 20160430     | 0.93     | 0.72 | 0.77  | 7.33                       | 13.29 | 13.12 | 0.01  | 0.11  | 0.08  | 1         | 1    | 1     |
| 20160903     | 0.70     | 0.76 | 0.81  | 16.67                      | 13.20 | 13.75 | -0.36 | -0.09 | -0.04 | -4        | 0    | 0     |
| 20161021     | 0.73     | 0.90 | 0.94  | 17.22                      | 8.47  | 8.50  | -0.16 | 0.03  | -0.01 | -2        | -1   | -1    |

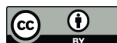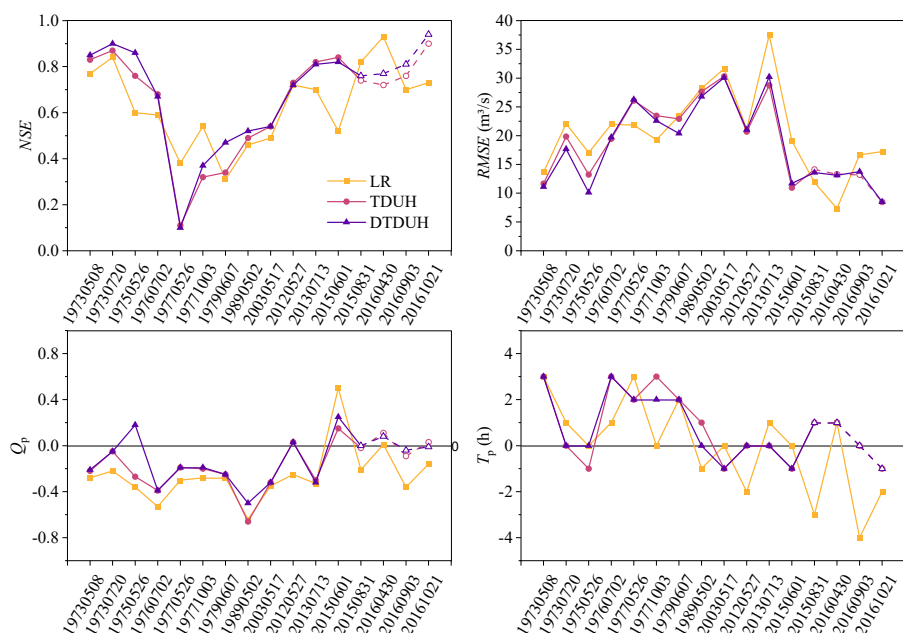

416

417 **Figure 11.** Line chart of the  $E_{NS}$ ,  $RMSE$ ,  $Q_p$ , and  $T_p$  for the Longhu River basin.

418 Results show that TDUH and DTDUH have consistent performances in  $E_{NS}$ ,  $RMSE$ , and  $T_p$ , and  
 419 results of the LR method are not stable, sometimes better than that of the DTDUH method, sometimes  
 420 worse (especially for the criteria  $Q_p$ ). In the calibration periods, DTDUH performed better than that of  
 421 TDUH, while in the validation periods, TDUH and DTDUH performed almost consistently. It may be  
 422 due to the initial conditions of flood events being different from each other. For the calibration periods,  
 423 the average  $E_{NS}$  of the LR, TDUH, and DTDUH methods are 0.58, 0.61 and 0.64, respectively, and  
 424 0.80, 0.78, and 0.82 for the validation periods. Simultaneously, the absolute error of the flood peak are  
 425 0.36, 0.25, and 0.24 for the calibration periods, respectively, and 0.18, 0.06, and 0.03 for the validation  
 426 periods. In general, the improvement from the DTDUH is small, and we summarized the possible  
 427 reasons as follows 1) The surface runoff accounts for 60% ~ 70% of the total runoff, and it is necessary  
 428 to consider the influence of the heterogeneity of the subsurface stormflow as well as the subsurface



429 runoff; 2) the antecedent soil moisture is high, and, thus, the simulation error caused by the spatial  
 430 heterogeneity of runoff generation is small.

431 Simultaneously, Table 5 lists the  $E_{NS}$ ,  $RMSE$ , error of flood peak ( $Q_p$ ), and error of time to peak  
 432 ( $T_p$ ) values for all the models of the Dongshi River basin, among which No. 20190609, 20190612,  
 433 20200522, and 20200607 are validation dataset. To demonstrate the model performances of different  
 434 strategies more visually, Fig. 12 shows line charts of the three runoff routing methods for the four  
 435 indexes in both calibration and validation periods. Compared with the results of Longhu River, the  
 436 DTDUH, and LR methods showed consistent performances, and were significantly better than the  
 437 TDUH method. It shows that the DTDUH method shows significant improvement in this basin.

438 **Table 5.** Calibrated and validated results of the Dongshi River basin.

| Flood events | $E_{NS}$ |      |       | $RMSE$ (m <sup>3</sup> /s) |       |       | $Q_p$ |       |       | $T_p$ (h) |      |       |
|--------------|----------|------|-------|----------------------------|-------|-------|-------|-------|-------|-----------|------|-------|
|              | LR       | TDUH | DTDUH | LR                         | TDUH  | DTDUH | LR    | TDUH  | DTDUH | LR        | TDUH | DTDUH |
| 20150509     | 0.37     | 0.09 | 0.32  | 12.61                      | 15.17 | 13.08 | -0.73 | -0.83 | -0.76 | 5         | 5    | 5     |
| 20150721     | 0.81     | 0.87 | 0.80  | 11.21                      | 9.25  | 11.60 | 0.02  | -0.16 | 0.06  | -1        | -1   | -1    |
| 20160811     | 0.61     | 0.54 | 0.67  | 5.17                       | 5.63  | 4.78  | -0.34 | -0.17 | -0.38 | 1         | 1    | 1     |
| 20160819     | 0.83     | 0.68 | 0.79  | 2.39                       | 3.34  | 2.71  | -0.26 | -0.40 | -0.26 | 0         | 0    | 0     |
| 20161021     | 0.93     | 0.81 | 0.94  | 6.99                       | 11.80 | 6.75  | -0.11 | -0.27 | -0.10 | 2         | 5    | 2     |
| 20170501     | 0.89     | 0.67 | 0.86  | 2.69                       | 4.75  | 3.11  | -0.16 | -0.27 | 0.00  | 0         | 1    | 0     |
| 20170515     | 0.64     | 0.78 | 0.64  | 3.95                       | 3.10  | 3.97  | -0.05 | -0.14 | -0.07 | 0         | 4    | 4     |
| 20170613     | 0.91     | 0.76 | 0.91  | 8.40                       | 13.48 | 8.28  | -0.26 | -0.38 | -0.22 | 2         | 2    | 2     |
| 20170929     | 0.75     | 0.53 | 0.73  | 3.71                       | 5.12  | 3.87  | -0.20 | -0.21 | 0.17  | -3        | 2    | 0     |
| 20180606     | 0.55     | 0.34 | 0.53  | 5.53                       | 6.73  | 5.68  | -0.51 | -0.55 | -0.55 | 1         | 1    | 1     |
| 20180702     | 0.55     | 0.59 | 0.48  | 4.17                       | 3.96  | 4.48  | -0.51 | -0.45 | -0.58 | 2         | 2    | 2     |
| 20190418     | 0.61     | 0.55 | 0.58  | 7.54                       | 8.00  | 7.79  | -0.63 | -0.67 | -0.65 | 2         | 12   | 2     |
| 20190609     | 0.55     | 0.56 | 0.75  | 13.27                      | 13.03 | 9.83  | -0.54 | -0.53 | -0.42 | 2         | 2    | 2     |
| 20190612     | 0.81     | 0.76 | 0.83  | 4.57                       | 5.09  | 4.36  | -0.18 | -0.06 | -0.02 | 0         | 0    | 0     |
| 20200522     | 0.77     | 0.56 | 0.75  | 5.24                       | 7.32  | 5.56  | -0.01 | -0.02 | -0.04 | 2         | 2    | 2     |
| 20200607     | 0.57     | 0.54 | 0.61  | 28.85                      | 30.03 | 27.54 | -0.50 | -0.54 | -0.50 | 0         | -1   | 2     |

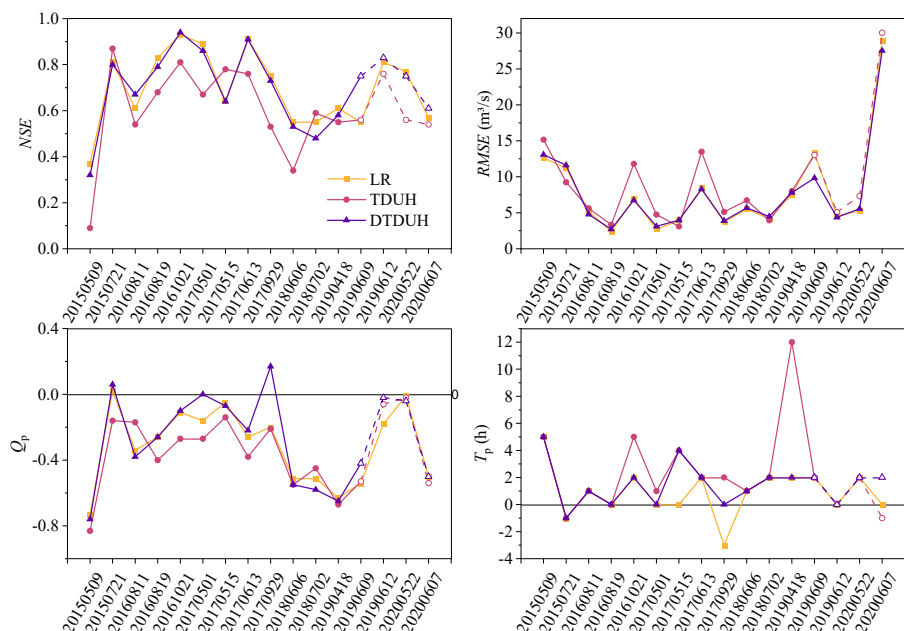

439

440 **Figure 12.** Line chart of the  $E_{NS}$ ,  $RMSE$ ,  $Q_p$ , and  $T_p$  for the Dongshi River basin.

441 In addition, we compared the calibrated parameter sets for the two basins, as given in Table 6. It  
 442 can be found that the parameters of the XAJ model are consistent for three runoff routing methods in  
 443 the two basins, which means that the derived TDUH and DTDUH are rational. For the Dongshi River  
 444 basin, the parameters calibrated using DTDUH methods are more consistent with the LR method  
 445 compared with that of the Longhu River basin, and it revealed that the simulated results using the LR  
 446 and DTDUH methods could be similar as each other. This conclusion is consistent with the simulation  
 447 results in Fig. 12, where the LR and DTDUH performed similarly.

448 **Table 6.** Calibrated parameters of the three runoff routing methods for the Longhu and Dongshi River  
 449 basins

| Parameters | Longhu |       |       | Dongshi |       |       |
|------------|--------|-------|-------|---------|-------|-------|
|            | LR     | TDUH  | DTDUH | LR      | TDUH  | DTDUH |
| $UM$       | 9.65   | 7.13  | 8.29  | 5.38    | 8.16  | 9.13  |
| $LM$       | 86.32  | 85.97 | 81.23 | 85.94   | 66.54 | 85.21 |
| $DM$       | 43.96  | 47.26 | 49.25 | 47.14   | 28.53 | 45.65 |



|           |       |       |       |       |       |       |
|-----------|-------|-------|-------|-------|-------|-------|
| <i>B</i>  | 0.13  | 0.39  | 0.36  | 0.40  | 0.40  | 0.40  |
| <i>IM</i> | 0.09  | 0.10  | 0.10  | 0.26  | 0.02  | 0.20  |
| <i>KC</i> | 0.12  | 0.80  | 0.80  | 1.48  | 1.50  | 1.44  |
| <i>C</i>  | 0.12  | 0.12  | 0.12  | 0.16  | 0.15  | 0.12  |
| <i>SM</i> | 23.93 | 33.84 | 35.98 | 50.00 | 50.00 | 50.00 |
| <i>EX</i> | 1.19  | 1.24  | 1.10  | 1.00  | 1.00  | 1.00  |
| <i>KI</i> | 0.63  | 0.43  | 0.41  | 0.17  | 0.11  | 0.13  |
| <i>KG</i> | 0.07  | 0.27  | 0.29  | 0.53  | 0.59  | 0.57  |
| <i>CI</i> | 0.20  | 0.51  | 0.56  | 0.51  | 0.52  | 0.49  |
| <i>CG</i> | 0.94  | 0.95  | 0.94  | 0.99  | 0.99  | 0.99  |
| <i>CS</i> | 0.99  | -     | -     | 1.00  | -     | -     |
| <i>L</i>  | 0.00  | 0.00  | 0.00  | 0.00  | 0.00  | 0.00  |

## 450 5. Discussion

### 451 5.1 Errors due to spatial scale mismatch between runoff generation and runoff routing

452 To investigate the possible errors due to spatial scale mismatch between runoff generation and  
 453 runoff routing, we assumed several sets of excess rainfall with intensities of 5, 10, 15, and 20 mm h<sup>-1</sup>,  
 454 and the saturated proportions of the basin are 0.25, 0.5, 0.75 and 1, respectively. Considering the  
 455 average rainfall intensities of the two basins, the time durations of the rainfall are assumed to change  
 456 from 1 to 4 h, and the combinations are shown in Table 7.

457 **Table 7.** Combinations of the assumed excess rainfall, time duration, and soil moisture content.

| Scenario     | Depth of excess rainfall (mm) | Time duration (h) | Soil moisture content |
|--------------|-------------------------------|-------------------|-----------------------|
| 1 (R-T1-S1)  | 20 (R)                        | 1 (T1)            | 0.25 (S1)             |
| 2 (R-T1-S2)  | 20 (R)                        | 1 (T1)            | 0.50 (S2)             |
| 3 (R-T1-S3)  | 20 (R)                        | 1 (T1)            | 0.75 (S3)             |
| 4 (R-T1-S4)  | 20 (R)                        | 1 (T1)            | 1.00 (S4)             |
| 5 (R-T2-S1)  | 20 (R)                        | 2 (T2)            | 0.25 (S1)             |
| 6 (R-T2-S2)  | 20 (R)                        | 2 (T2)            | 0.50 (S2)             |
| 7 (R-T2-S3)  | 20 (R)                        | 2 (T2)            | 0.75 (S3)             |
| 8 (R-T2-S4)  | 20 (R)                        | 2 (T2)            | 1.00 (S4)             |
| 9 (R-T3-S1)  | 20 (R)                        | 3 (T3)            | 0.25 (S1)             |
| 10 (R-T3-S2) | 20 (R)                        | 3 (T3)            | 0.50 (S2)             |
| 11 (R-T3-S3) | 20 (R)                        | 3 (T3)            | 0.75 (S3)             |
| 12 (R-T3-S4) | 20 (R)                        | 3 (T3)            | 1.00 (S4)             |



|              |        |        |           |
|--------------|--------|--------|-----------|
| 13 (R-T4-S1) | 20 (R) | 4 (T4) | 0.25 (S1) |
| 14 (R-T4-S2) | 20 (R) | 4 (T4) | 0.50 (S2) |
| 15 (R-T4-S3) | 20 (R) | 4 (T4) | 0.75 (S3) |
| 16 (R-T4-S4) | 20 (R) | 4 (T4) | 1.00 (S4) |

458 Thus, 16 combinations can be formed based on Table 7. For example, combination R-T1-S1  
 459 indicates there is a total depth of 20 mm excess rainfall in the global watershed with the time duration  
 460 being 1 hour ( $20 \text{ mm h}^{-1}$ ), and the saturated proportion of the basin is 0.25. Similarly, combination R-  
 461 T3-S2 indicates there is a total depth of 20 mm excess rainfall in the global watershed with the time  
 462 durations being 4 hours ( $5 \text{ mm h}^{-1}$ ), and the saturated proportion of the basin is 0.50. Then, the flow  
 463 hydrograph due to the assumed excess rainfall can be obtained using the TDUH and the DTDUH, thus  
 464 comparing the errors of spatial scale mismatch between runoff generation and runoff routing. The flow  
 465 hydrograph computed using the TDUH and DTDUH corresponding to the two basins is shown in Fig.  
 466 13 and Fig. 14, respectively.

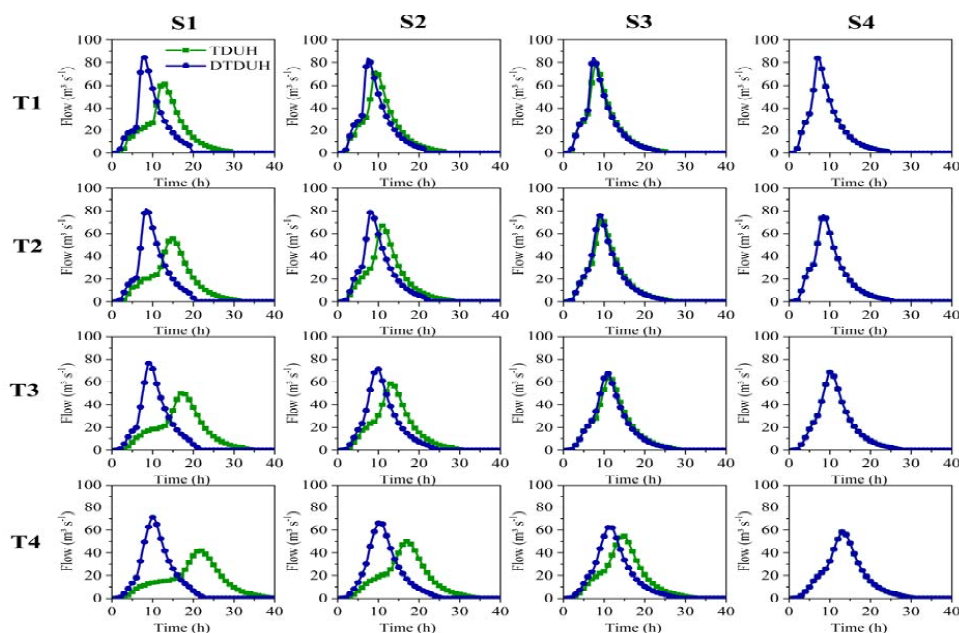

467

468 **Figure 13.** Errors in the flow hydrograph due to spatial mismatch between runoff generation and runoff



469 routing for the Longhu River basin

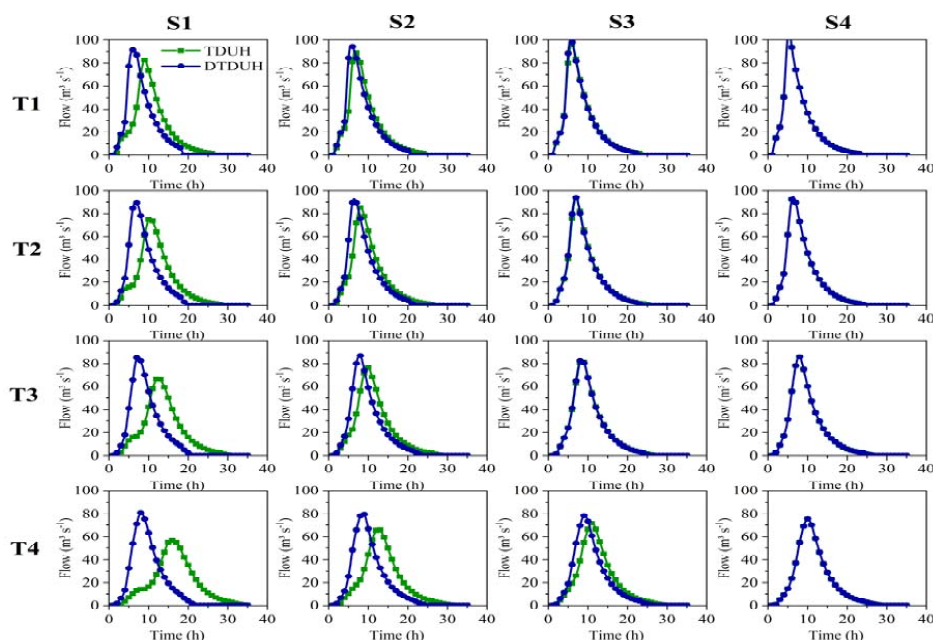

470

471 **Figure 14.** Errors in the flow hydrograph due to spatial mismatch between runoff generation and runoff  
472 routing for the Dongshi River basin.

473 It can be found from Fig. 13 that the soil moisture significantly influences the results of the TDUH,  
474 while the results of the DTDUH are almost not changed with the variation of soil moisture for the  
475 Longhu River basin. When the saturated soil moisture proportion is low, the results of the two routing  
476 methods are significantly different. Simultaneously, when the saturated soil moisture proportion  
477 exceeds 0.5, the results of the TDUH and the DTDUH perform almost consistently. The differences  
478 between the results of the two methods increase with the duration of excess rainfall.

479 For the Dongshi River basin, it can be seen from Fig. 14 that patterns of the soil moisture and  
480 time duration on the performances are consistent with those of the Longhu River basin. Conversely,  
481 the soil moisture shows a more pronounced effect on the DTDUH, and the flow peak discharge



482 becomes higher with the soil moisture changing from S1 to S4. It can also be found that the differences  
483 between the results of the TDUH and the DTDUH in the Dongshi River basin are also significant, but  
484 show more limited for the Dongshi River basin than that of the Longhu River basin.

485 In summary, the performances of the TDUH and DTDUH are consistent for higher soil moisture  
486 and higher rainfall intensity. When the soil moisture is low and the time duration of the excess rainfall  
487 is long, we should pay much attention to the errors due to the spatial scale mismatch between runoff  
488 generation and runoff routing. Additionally, the differences caused by this mismatch vary significantly  
489 in different watersheds.

## 490 *5.2 Advantages and limitations of the proposed DTDUH*

491 Based on the analysis of Sections 4.3 and 5.2, we found that the accuracy of DTDUHs varies in  
492 different basins, specifically, performances of the DTDUH in the Longhu basin are more similar to  
493 that of the TDUHs, while the simulation results in the Dongshi basin are more consistent with that of  
494 the LR method. In general, the DTDUHs performed the best over the three runoff routing methods for  
495 both test cases. There are many reasons why DTDUH simulation is superior than others, and we  
496 summarized the main differences between TDUH and DTDUHs, including their definition and  
497 assumptions. The DTDUH was defined as a typical hydrograph of direct runoff which gets generated  
498 from one centimeter of effective rainfall falling at a uniform rate over the saturated drainage basin  
499 uniformly during a specific duration. This realization was significantly different from the  
500 understandings of Sherman (1932), who defined the unit hydrograph of a watershed as a direct runoff  
501 hydrograph that results from 10 mm of excess rainfall that is generated uniformly over the drainage  
502 area at a constant rate for an effective duration. The proposed DTDUH was computed based on the





503 runoff generation areas instead of the whole basin, and this is the main advantage of DTDUH over  
 504 TDUHs. Simultaneously, the assumption of the DTDUH remained unchanged as the traditional unit  
 505 hydrograph, such as a spatially uniform distributed effective precipitation. Some researchers also did  
 506 similar research. For example, Andrieu et al. (2021) proposed an Event-specific Geomorphological  
 507 Instantaneous Unit Hydrograph (E-GIUH), and the method relies on the width function-based GIUH  
 508 (Rigon et al., 2016), as adapted to take into account the spatial variability of rainfall through replacing  
 509 the width function by the rainfall width function.

510 Although DTDUH showed advantages in both basins, the degree of improvement compared with  
 511 TDUH was not consistent. Therefore, we summarized the potential limitations of the DTDUH. First,  
 512 we utilized the DTDUH only for the surface runoff in both basins, proportions of the subsurface storm  
 513 flow and subsurface runoff may cause considerable interference to the simulation results. Runoff  
 514 components of the Longhu and Dongshi River basins are given in Fig. 15.

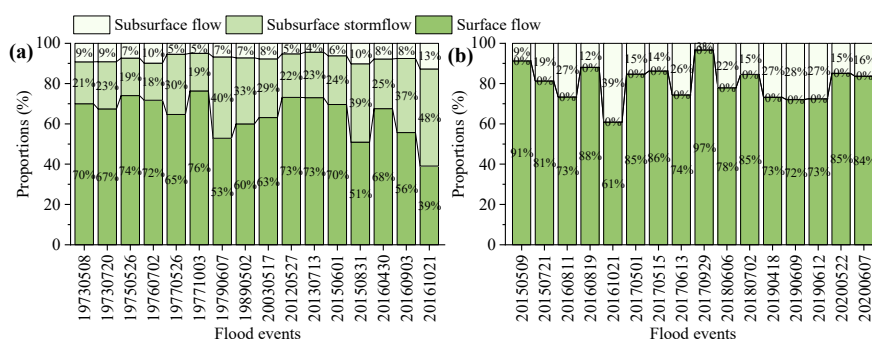

515  
 516 **Figure 15.** Details of the runoff components of the 16 flood events for the (a) Longhu River basin. (b)  
 517 Dongshi River basin.

518 Fig. 15 shows that the average surface runoff ratio in Longhu basin and Dongshi basin is 64.4%  
 519 and 80.3%, respectively. This result suggested that the improvement in accuracy caused by DTDUH



520 may be more significant in the Dongshi basin. And, this conclusion is consistent with the calibration  
521 and verification results in Section 4.3. Second, a hybrid runoff generation process pattern formed by  
522 more than one mechanism can often be identified in semi-humid, semi-arid, and mountain watersheds,  
523 because of the heterogeneity of underlying surface conditions and meteorological factors (Hu et al.,  
524 2021; Yi et al., 2023). When there occurs more than the saturation-excess rainfall, the saturated area  
525 extraction method based on the TWI will not be applicable as the excess rainfall can also be generated  
526 from the unsaturated areas.

527 Fig. 16 shows the antecedent soil moisture conditions for the Longhu and Dongshi River basins.  
528 It can be found that the antecedent soil moisture can be low for some flood events, such as No.  
529 19790607, 19890502, 20150509, and so on. When the antecedent soil moisture is low and the rainfall  
530 intensity is high, the drainage basin may produce not only the saturation excess, which results in low  
531 accuracy of the DTDUH method.

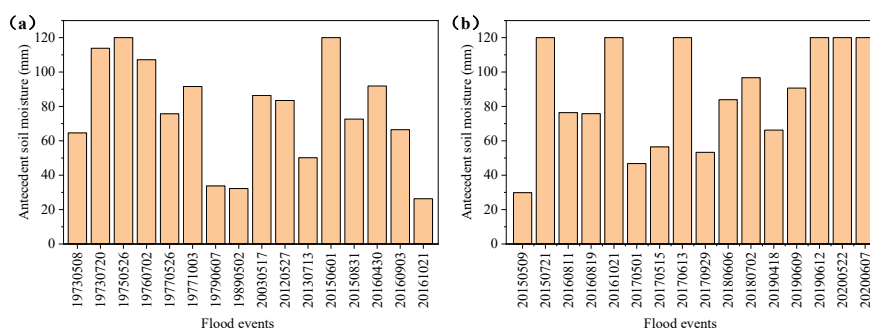

532  
533 **Figure 16.** Details of the antecedent soil moisture of the 16 flood events for the (a) Longhu River basin.  
534 (b) Dongshi River basin.

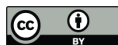

## 535 6. Conclusions

536 A novel DTDUH method was proposed to explore the influence of spatial heterogeneity of runoff  
537 generation on the runoff routing. The XAJ model was used as the hydrological modeling framework.  
538 The Longhu River basin and the Dongshi River basin were selected as two case studies. The results of  
539 the three surface runoff routing methods including the linear reservoir, TDUH, and DTDUH were  
540 compared. The advantages and shortcomings of the proposed method have been discussed. The main  
541 conclusions can be summarized as follows:

542 1. A novel DTDUH method designed for surface runoff routing was proposed based on the TDUH  
543 method. The traditional TDUH method was derived based on the whole basin, and the proposed  
544 method was designed only for the saturated areas. The DTDUH method considered not only the time-  
545 varying rainfall intensities and soil moisture, but also the time-varying saturated areas of the watershed  
546 which were extracted based on the TWI.

547 2. The rationality of the proposed method was verified by comparing the performances of  
548 XAJ+LR, XAJ + TDUH, and XAJ +DTDUH models, which were calibrated separately. Results show  
549 that the proposed method exhibited consistent or better performance compared with that of the LR  
550 routing method, and performed better than the TDUH method.

551 3. The influence of spatial heterogeneity of runoff generation on the runoff routing was carried  
552 out by comparing the performances of the TDUH and the DTDUH. Results show that the heterogeneity  
553 of runoff generation can be significantly different in different basins. Simultaneously, the heterogeneity  
554 of various runoff components is supposed to be considered.



555 **Data availability**

556 Due to the strict security requirements from the departments, some or all data, models,  
557 or code generated or used in the study are proprietary or confidential in nature and may  
558 only be provided with restrictions (e.g. anonymized data).

559 **Author contributions**

560 Bin Yi conceived the original idea, designed the methodology, developed the code, and  
561 performed the study. Lu Chen, Bin Yi, Binlin Yang, Zhiyuan Leng, Siming Li, and Tao  
562 Xie contributed to the interpretation of the results. Bin Yi wrote the paper, and Lu Chen  
563 revised the paper.

564 **Competing interests**

565 The authors declare that they have no conflict of interest.

566 **Acknowledgments**

567 This study was financially supported by the National Key R&D Program of China  
568 (2023YFC3081000, 2021YFC3200400), and the Science and Technology Plan Projects  
569 of Tibet Autonomous Region (XZ202301YD0044C).

570 **References**

- 571 Ajward, M. H., Muzik, I., 2000. A spatially varied unit hydrograph model. *Journal of*  
572 *Environmental Hydrology*, 8(7).
- 573 Andrieu, H., Moussa, R., Kirstetter, P.-E., 2021. The Event-specific Geomorphological  
574 Instantaneous Unit Hydrograph (E-GIUH): The basin hydrological response  
575 characteristic of a flood event. *Journal of Hydrology*, 603: 127158.  
576 <https://doi.org/10.1016/j.jhydrol.2021.127158>.
- 577 Beven, K. J., Kirkby, M. J., 1979. A physically based, variable contributing area model  
578 of basin hydrology / Un modèle à base physique de zone d'appel variable de  
579 l'hydrologie du bassin versant. *Hydrological Sciences Bulletin*, 24(1): 43-69.  
580 <https://doi.org/10.1080/02626667909491834>.



- 581 Boughton, W., 2004. The Australian water balance model. *Environmental Modelling &*  
582 *Software*, 19(10): 943-956. <https://doi.org/10.1016/j.envsoft.2003.10.007>.
- 583 Brunner, M. I., Swain, D. L., Wood, R. R., Willkofer, F., Done, J. M., Gilleland, E.,  
584 Ludwig, R., 2021. An extremeness threshold determines the regional response  
585 of floods to changes in rainfall extremes. *Communications Earth &*  
586 *Environment*, 2(1): 173. <https://doi.org/10.1038/s43247-021-00248-x>.
- 587 Bunster, T., Gironás, J., Niemann, J. D., 2019. On the influence of upstream flow  
588 contributions on the basin response function for hydrograph prediction. *Water*  
589 *Resources Research*, 55(6): 4915-4935.  
590 <https://doi.org/10.1029/2018WR024510>.
- 591 Cho, Y., Engel, B. A., Merwade, V. M., 2018. A spatially distributed Clark's unit  
592 hydrograph based hybrid hydrologic model (Distributed-Clark). *Hydrological*  
593 *Sciences Journal*, 63(10): 1519-1539.  
594 <https://doi.org/10.1080/02626667.2018.1516042>.
- 595 Clark, C. O., 1945. Storage and the Unit Hydrograph. *Transactions of the American*  
596 *Society of Civil Engineers*, 110(1): 1419-1446.  
597 <https://doi.org/10.1061/TACEAT.0005800>.
- 598 Czyzyk, K., Mirossi, D., Abdoulhak, A., Hassani, S., Niemann, J. D., Gironás, J., 2020.  
599 Impacts of Channel Network Type on the Unit Hydrograph. *Water*, 12(3): 669.  
600 <https://doi.org/10.3390/w12030669>.
- 601 Du, J., Xie, H., Hu, Y., Xu, Y., Xu, C.-Y., 2009. Development and testing of a new storm  
602 runoff routing approach based on time variant spatially distributed travel time  
603 method. *Journal of Hydrology*, 369(1-2): 44-54.  
604 <https://doi.org/10.1016/j.jhydrol.2009.02.033>.
- 605 Duan, Q., Sorooshian, S., Gupta, V., 1992. Effective and efficient global optimization  
606 for conceptual rainfall - runoff models. *Water Resources Research*, 28(4):  
607 1015-1031. <https://doi.org/10.1029/91WR02985>.
- 608 Foda, R. F., Awadallah, A. G., Gad, M. A., 2017. A Fast Semi Distributed Rainfall  
609 Runoff Model for Engineering Applications in Arid and Semi-Arid Regions.  
610 *Water Resources Management*, 31(15): 4941-4955.  
611 <https://doi.org/10.1007/s11269-017-1787-2>.
- 612 Gao, H., Birkel, C., Hrachowitz, M., Tetzlaff, D., Soulsby, C., Savenije, H. H. G., 2019.  
613 A simple topography-driven and calibration-free runoff generation module.  
614 *Hydrology and Earth System Sciences*, 23(2): 787-809. 10.5194/hess-23-787-  
615 2019.
- 616 Gibbs, M., Dandy, G., Maier, H., 2010. Evaluation of parameter setting for two GIS  
617 based unit hydrograph models. *Journal of Hydrology*, 393(3-4): 197-205.  
618 <https://doi.org/10.1016/j.jhydrol.2010.08.014>.
- 619 Goñi, M., López, J. J., Gimena, F. N., 2019. Geomorphological instantaneous unit  
620 hydrograph model with distributed rainfall. *CATENA*, 172: 40-53.  
621 <https://doi.org/10.1016/j.catena.2018.08.010>.
- 622 Goodrich, D. C., Lane, L. J., Shillito, R. M., Miller, S. N., Syed, K. H., Woolhiser, D.



- 623 A., 1997. Linearity of basin response as a function of scale in a semiarid  
624 watershed. *Water Resources Research*, 33(12): 2951-2965.  
625 <https://doi.org/10.1029/97WR01422>.
- 626 Gray, D. M., 1961. Synthetic Unit Hydrographs for Small Watersheds. *Journal of the*  
627 *Hydraulics Division*, 87(4): 33-54. <https://doi.org/10.1061/JYCEAJ.0000631>.
- 628 Grimaldi, S., Petroselli, A., Alonso, G., Nardi, F., 2010. Flow time estimation with  
629 spatially variable hillslope velocity in ungauged basins. *Advances in Water*  
630 *Resources*, 33(10): 1216-1223.  
631 <https://doi.org/10.1016/j.advwatres.2010.06.003>.
- 632 Grimaldi, S., Petroselli, A., Nardi, F., 2012. A parsimonious geomorphological unit  
633 hydrograph for rainfall–runoff modelling in small ungauged basins.  
634 *Hydrological Sciences Journal*, 57(1): 73-83.  
635 <https://doi.org/10.1080/02626667.2011.636045>.
- 636 Gupta, V. K., Waymire, E., Wang, C. T., 1980. A representation of an instantaneous unit  
637 hydrograph from geomorphology. *Water Resources Research*, 16(5): 855-862.  
638 <https://doi.org/10.1029/WR016i005p00855>.
- 639 Hoang, L., Schneiderman, E. M., Moore, K. E. B., Mukundan, R., Owens, E. M.,  
640 Steenhuis, T. S., 2017. Predicting saturation-excess runoff distribution with a  
641 lumped hillslope model: SWAT-HS. *Hydrological Processes*, 31(12): 2226-2243.  
642 <https://doi.org/10.1002/hyp.11179>.
- 643 Hu, C. H., Ran, G., Li, G., Yu, Y., Wu, Q., Yan, D. H., Jian, S. Q., 2021. The effects of  
644 rainfall characteristics and land use and cover change on runoff in the Yellow  
645 River basin, China. *Journal of Hydrology and Hydromechanics*, 69(1): 29-40.  
646 <https://doi.org/10.2478/johh-2020-0042>.
- 647 Huang, Q., Qin, G., Zhang, Y., Tang, Q., Liu, C., Xia, J., Chiew, F. H. S., Post, D., 2020.  
648 Using Remote Sensing Data-Based Hydrological Model Calibrations for  
649 Predicting Runoff in Ungauged or Poorly Gauged Catchments. *Water Resources*  
650 *Research*, 56(8): e2020WR028205. <https://doi.org/10.1029/2020WR028205>.
- 651 Kirkby, M. J., 1976. Tests of the random network model, and its application to basin  
652 hydrology. *Earth Surface Processes*, 1(3): 197-212.  
653 <https://doi.org/10.1002/esp.3290010302>.
- 654 Lee, K. T., Chen, N.-C., Chung, Y.-R., 2008. Derivation of variable IUH corresponding  
655 to time-varying rainfall intensity during storms/Dérivation d'un HUI variable  
656 correspondant à l'évolution temporelle de l'intensité pluviométrique durant les  
657 averses. *Hydrological Sciences Journal*, 53(2): 323-337.  
658 <https://doi.org/10.1623/hysj.53.2.323>.
- 659 Li, H. Y., Sivapalan, M., 2014. Functional approach to exploring climatic and landscape  
660 controls on runoff generation: 2 Timing of runoff storm response. *Water*  
661 *Resources Research*, 50(12): 9323-9342.  
662 <https://doi.org/10.1002/2014wr016308>.
- 663 Liang, X., Lettenmaier, D. P., Wood, E. F., Burges, S. J., 1994. A simple hydrologically  
664 based model of land surface water and energy fluxes for general circulation



- 665 models. *Journal of Geophysical Research: Atmospheres*, 99(D7): 14415-14428.  
666 <https://doi.org/10.1029/94JD00483>.
- 667 Maidment, D. R., Olivera, F., Calver, A., Eatherall, A., Fraczek, W., 1996. Unit  
668 Hydrograph Derived from a Spatially Distributed Velocity Field. *Hydrological*  
669 *Processes*, 10(6): 831-844. [https://doi.org/10.1002/\(SICI\)1099-1085\(199606\)10:6<831::AID-HYP374>3.0.CO;2-N](https://doi.org/10.1002/(SICI)1099-1085(199606)10:6<831::AID-HYP374>3.0.CO;2-N).
- 670  
671 Martinez, V., Garcia, A., Ayuga, F., 2002. Distributed routing techniques developed on  
672 GIS for generating synthetic unit hydrographs. *Transactions of the ASAE*, 45(6):  
673 1825. <https://doi.org/10.13031/2013.11433>.
- 674 Melesse, A. M., Graham, W. D., 2004. Storm runoff prediction based on a spatially  
675 distributed travel time method utilizing remote sensing and GIS. *Journal of the*  
676 *American Water Resources Association*, 40(4): 863-879.  
677 <https://doi.org/10.1111/j.1752-1688.2004.tb01051.x>.
- 678 Minshall, N. E., 1960. Predicting storm runoff on small experimental watersheds.  
679 *Journal of the Hydraulics Division*, 86(8): 17-38
- 680 Monajemi, P., Khaleghi, S., Maleki, S., 2021. Derivation of instantaneous unit  
681 hydrographs using linear reservoir models. *Hydrology Research*, 52(2): 339-  
682 355. <https://doi.org/10.2166/nh.2021.171>.
- 683 Moore, R. J., 2007. The PDM rainfall-runoff model. *Hydrol. Earth Syst. Sci.*, 11(1):  
684 483-499. <https://doi.org/10.5194/hess-11-483-2007>.
- 685 Noto, L. V., La Loggia, G., 2007. Derivation of a distributed unit hydrograph integrating  
686 GIS and remote sensing. *Journal of Hydrologic Engineering*, 12(6): 639-650.  
687 [https://doi.org/10.1061/\(ASCE\)1084-0699\(2007\)12:6\(639\)](https://doi.org/10.1061/(ASCE)1084-0699(2007)12:6(639)).
- 688 Paul, P. K., Kumari, N., Panigrahi, N., Mishra, A., Singh, R., 2018. Implementation of  
689 cell-to-cell routing scheme in a large scale conceptual hydrological model.  
690 *Environmental Modelling & Software*, 101: 23-33.  
691 <https://doi.org/10.1016/j.envsoft.2017.12.003>.
- 692 Rigon, R., Bancheri, M., Formetta, G., De Lavenne, A., 2016. The geomorphological  
693 unit hydrograph from a historical - critical perspective. *Earth Surface Processes*  
694 *Landforms*, 41(1): 27-37. <https://doi.org/10.1002/esp.3855>.
- 695 Rodríguez-Iturbe, I., González-Sanabria, M., Bras, R. L., 1982. A geomorphoclimatic  
696 theory of the instantaneous unit hydrograph. *Water Resources Research*, 18(4):  
697 877-886. <https://doi.org/10.1029/WR018i004p00877>.
- 698 Rodríguez-Iturbe, I., Valdés, J. B., 1979. The geomorphologic structure of hydrologic  
699 response. *Water Resources Research*, 15(6): 1409-1420.  
700 <https://doi.org/10.1029/WR015i006p01409>.
- 701 Rodríguez-Iturbe, I., Ijász-Vásquez, E. J., Bras, R. L., & Tarboton, D. G., 1992. Power  
702 law distributions of discharge mass and energy in river basins. *Water Resources*  
703 *Research*, 28(4), 1089– 1093. <https://doi.org/10.1029/91WR03033>.
- 704 Sherman, L. K.: Streamflow from rainfall by the unit-graph method, *Eng. News-Rec.*,  
705 108:501-505, 1932.
- 706 Sarangi, A., Madramootoo, C. A., Enright, P., Prasher, S. O., 2007. Evaluation of three



- 707 unit hydrograph models to predict the surface runoff from a Canadian watershed.  
708 Water Resources Management, 21(7): 1127-1143.  
709 <https://doi.org/10.1007/s11269-006-9072-9>.
- 710 Seo, Y., Park, S. Y., Schmidt, A. R., 2016. Implication of the flow resistance formulae  
711 on the prediction of flood wave propagation. Hydrological Sciences Journal,  
712 61(4): 683-695. <https://doi.org/10.1080/02626667.2014.992787>.
- 713 Shi, P., Rui, X. F., Qu, S. M., Chen, X., 2008. Calculating storage capacity with  
714 topographic index. Advances in Water Science, 19(2): 264-267
- 715 Snyder, F. F., 1938. Synthetic unit-graphs. Eos, Transactions American Geophysical  
716 Union, 19(1): 447-454. <https://doi.org/10.1029/TR019i001p00447>.
- 717 Tong, B., Li, Z., Yao, C., Wang, J., Huang, Y., 2018. Derivation of the Spatial  
718 Distribution of Free Water Storage Capacity Based on Topographic Index. Water,  
719 10(10): 1407. <https://doi.org/10.3390/w10101407>.
- 720 Tromp-Van Meerveld, H. J., McDonnell, J. J., 2006. Threshold relations in subsurface  
721 stormflow: 1. A 147-storm analysis of the Panola hillslope. Water Resources  
722 Research, 42(2): W02411. <https://doi.org/10.1029/2004wr003778>.
- 723 Yi, B., Chen, L., 2022. A time-varying distributed unit hydrograph method considering  
724 dynamic flow routing path. Advances in Water Science, 33(6): 944-954.  
725 <https://doi.org/10.14042/j.cnki.32.1309.2022.06.009>.
- 726 Yi, B., Chen, L., Liu, Y., Guo, H., Leng, Z., Gan, X., Xie, T., Mei, Z., 2023.  
727 Hydrological modelling with an improved flexible hybrid runoff generation  
728 strategy. Journal of Hydrology, 620: 129457.  
729 <https://doi.org/10.1016/j.jhydrol.2023.129457>.
- 730 Yi, B., Chen, L., Zhang, H., Singh, V. P., Jiang, P., Liu, Y., Guo, H., Qiu, H., 2022. A  
731 time-varying distributed unit hydrograph method considering soil moisture.  
732 Hydrology and Earth System Sciences, 26(20): 5269-5289.  
733 <https://doi.org/10.5194/hess-26-5269-2022>.
- 734 Yuan, F., Zhang, L., Soe, K. M., Ren, L., Zhao, C., Zhu, Y., Jiang, S., Liu, Y., 2019.  
735 Applications of TRMM- and GPM-Era Multiple-Satellite Precipitation  
736 Products for Flood Simulations at Sub-Daily Scales in a Sparsely Gauged  
737 Watershed in Myanmar. Remote Sensing, 11(2): 140.  
738 <https://doi.org/10.3390/rs11020140>.
- 739 Zhao, R. J., 1992. The Xinanjiang model applied in China. Journal of Hydrology, 135(1):  
740 371-381. [https://doi.org/10.1016/0022-1694\(92\)90096-E](https://doi.org/10.1016/0022-1694(92)90096-E).
- 741 Zhao, R. J., Zuang, Y. L., Fang, L. R., Liu, X. R., 1980. The Xinanjiang  
742 model[C]//Proceedings of the Oxford Symposium: 351-356.  
743 [https://doi.org/10.1016/0022-1694\(92\)90096-E](https://doi.org/10.1016/0022-1694(92)90096-E).
- 744 Zhou, Q., Chen, L., Singh, V. P., Zhou, J., Chen, X., Xiong, L., 2019. Rainfall-runoff  
745 simulation in karst dominated areas based on a coupled conceptual hydrological  
746 model. Journal of Hydrology, 573: 524-533.  
747 <https://doi.org/10.1016/j.jhydrol.2019.03.099>.
